# Supplementary material
Source: PubMed Central journal article supplement (PMC2596597)
Supplement: NIHMS61798-supplement-si20061128_033.pdf [file NIHMS61798-supplement-si20061128_033.pdf]

## Supporting Information

### Synthesis of Docetaxel and Butitaxel Analogues Through Kinetic Resolution of Racemic $\beta$ -Lactams with 7-*O*-Triethylsilylbaccatin III

Haibo Ge,<sup>a</sup> Jared T. Spletstoser,<sup>a</sup> Yan Yang,<sup>b</sup> Margaret Kayser,<sup>b\*</sup> and Gunda I. Georg<sup>a\*</sup>

<sup>a</sup>Department of Medicinal Chemistry,<sup>a</sup> University of Kansas, 1251 Wescoe Hall Drive,  
University of Kansas, Lawrence, KS 66045-7582, USA

<sup>b</sup>Department of Physical Sciences, University of New Brunswick, Saint John, NB E2L 4L5, Canada

[georg@ku.edu](mailto:georg@ku.edu)

#### Table of Contents

|                                                                                                                                                |     |
|------------------------------------------------------------------------------------------------------------------------------------------------|-----|
| General procedure for the synthesis of $\beta$ -lactams <b>4</b>                                                                               | S2  |
| <i>cis</i> -( $\pm$ )-4-Phenyl-3- <i>tert</i> -butyldimethylsilyloxy-1-(4-methoxyphenyl)azetidin-2-one ( <b>4a</b> )                           | S2  |
| <i>cis</i> -( $\pm$ )-4-Phenyl-3-triisopropylsilyloxy-1-(4-methoxyphenyl)azetidin-2-one ( <b>4b</b> )                                          | S3  |
| <i>cis</i> -( $\pm$ )-4-Phenyl-3-triethylsilyloxy-1-(4-methoxyphenyl)azetidin-2-one ( <b>4c</b> )                                              | S3  |
| <i>cis</i> -( $\pm$ )-4- <i>tert</i> -Butyl-3- <i>tert</i> -butyldimethylsilyloxy-1-(4-methoxyphenyl)azetidin-2-one ( <b>4d</b> )              | S3  |
| <i>cis</i> -( $\pm$ )-4- <i>tert</i> -Butyl-3- <i>tert</i> -trisoproylsilyloxy-1-(4-methoxyphenyl)azetidin-2-one ( <b>4e</b> )                 | S3  |
| General procedure for the synthesis of $\beta$ -lactams <b>5</b>                                                                               | S4  |
| <i>cis</i> -( $\pm$ )-1-( <i>tert</i> -Butoxycarbonyl)-3-triisopropylsilyloxy-4-phenylazetidin-2-one ( <b>5b</b> )                             | S4  |
| <i>cis</i> -( $\pm$ )-1-( <i>tert</i> -Butoxycarbonyl)-3-triethylsilyloxy-4-phenylazetidin-2-one ( <b>5c</b> )                                 | S4  |
| <i>cis</i> -( $\pm$ )-1-( <i>tert</i> -Butoxycarbonyl)-3- <i>tert</i> -butyldimethylsilyloxy-4- <i>tert</i> -butylazetidin-2-one ( <b>5d</b> ) | S4  |
| <i>cis</i> -( $\pm$ )-1-( <i>tert</i> -Butoxycarbonyl)-3-triisopropylsilyloxy-4- <i>tert</i> -butylazetidin-2-one ( <b>5e</b> )                | S5  |
| Synthesis of 2'- <i>O</i> - <i>tert</i> -butyldimethylsilyl-7- <i>O</i> -triethylsilyldocetaxel ( <b>11</b> )                                  | S5  |
| Procedure for the synthesis of 10-acetyldocetaxel ( <b>8</b> ) from <b>11</b>                                                                  | S5  |
| References                                                                                                                                     | S6  |
| <sup>1</sup> H NMR of <b>4c</b>                                                                                                                | S7  |
| <sup>13</sup> C NMR of <b>4c</b>                                                                                                               | S8  |
| <sup>1</sup> H NMR of <b>4d</b>                                                                                                                | S9  |
| <sup>13</sup> C NMR of <b>4d</b>                                                                                                               | S10 |
| <sup>1</sup> H NMR of <b>4e</b>                                                                                                                | S11 |
| <sup>13</sup> C NMR of <b>4e</b>                                                                                                               | S12 |
| <sup>1</sup> H NMR of <b>5a</b>                                                                                                                | S13 |
| <sup>13</sup> C NMR of <b>5a</b>                                                                                                               | S14 |
| Expanded <sup>13</sup> C NMR of <b>5a</b>                                                                                                      | S15 |
| <sup>1</sup> H NMR of <b>5b</b>                                                                                                                | S16 |
| <sup>13</sup> C NMR of <b>5b</b>                                                                                                               | S17 |
| <sup>1</sup> H NMR of <b>5c</b>                                                                                                                | S18 |

|                                                            |     |
|------------------------------------------------------------|-----|
| <sup>13</sup> C NMR of <b>5c</b>                           | S19 |
| <sup>1</sup> H NMR of <b>5d</b>                            | S20 |
| <sup>13</sup> C NMR of <b>5d</b>                           | S21 |
| Expanded <sup>13</sup> C NMR of <b>5d</b>                  | S22 |
| <sup>1</sup> H NMR of <b>5e</b>                            | S23 |
| <sup>13</sup> C NMR of <b>5e</b>                           | S24 |
| HPLC trace entry 1, Table 1                                | S25 |
| HPLC trace entry 2, Table 1                                | S26 |
| HPLC trace entry 3, Table 1                                | S27 |
| HPLC trace entry 4, Table 1                                | S28 |
| HPLC trace entry 5, Table 1                                | S29 |
| HPLC trace entry 1, Table 2                                | S30 |
| HPLC trace entry 3, Table 2                                | S31 |
| HPLC trace entry 4, Table 2                                | S32 |
| HPLC trace entry 5, Table 2                                | S33 |
| HPLC trace entry 6, Table 2                                | S34 |
| HPLC trace for compound <b>8</b> , prepared from <b>11</b> | S35 |

**General procedure for the synthesis of  $\beta$ -lactams **4**.** To a stirred solution of  $\beta$ -lactam **3** (1.06 mmol) in ACS grade acetone (20 mL; methanol for **3b**) at 0 °C, open to the air, was added a 2*N* solution of LiOH in water (178 mg, 4.24 mmol; K<sub>2</sub>CO<sub>3</sub> for **3b**, 44.0 mg, 0.318 mmol). The reaction mixture was allowed to warm to room temperature over 1 h and was then diluted with EtOAc (50 mL) and washed with water. The organic layer was separated, washed with brine, dried over MgSO<sub>4</sub>, and concentrated under reduced pressure to afford a solid. To a solution of the solid thus obtained in CH<sub>2</sub>Cl<sub>2</sub> (10 mL), was added imidazole (144 mg, 2.12 mmol; 289 mg, 4.24 mmol for **3a**), chlorotrialkylsilane (2.12 mmol; 4.24 mmol for **3a**), and DMAP (518 mg, 4.24 mmol, only for **3a**) and was stirred under argon at room temperature for 5 h. The mixture was diluted with CH<sub>2</sub>Cl<sub>2</sub> and then quenched with water (20 mL). The aqueous layer was extracted with CH<sub>2</sub>Cl<sub>2</sub>, and the combined organic layers were washed with brine, dried over MgSO<sub>4</sub>, and concentrated under reduced pressure. Flash column chromatography on silica gel afforded the products.

***cis*-(±)-4-Phenyl-3-*tert*-butyldimethylsilyloxy-1-(4-methoxyphenyl)azetidin-2-one (**4a**).**

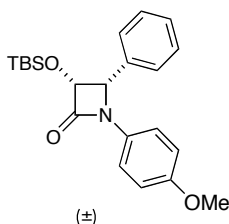

Yield = 95%, off-white solid. The compound showed spectroscopic properties in agreement with the literature.<sup>1</sup>

***cis*-(±)-4-Phenyl-3-triisopropylsilyloxy-1-(4-methoxyphenyl)azetidin-2-one (4b).**

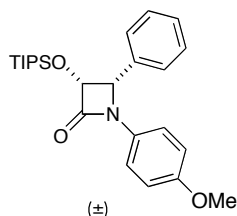

Yield = 98%, off-white solid. The compound showed spectroscopic properties in agreement with the literature.<sup>2</sup>

***cis*-(±)-4-Phenyl-3-triethylsilyloxy-1-(4-methoxyphenyl)azetidin-2-one (4c).**

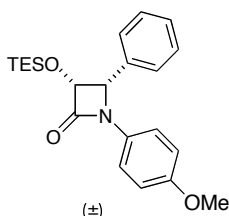

Yield = 85%, white solid, mp = 100-102 °C; IR (neat) 2954, 2912, 2877, 1747, 1514, 1249 cm<sup>-1</sup>; <sup>1</sup>H NMR (400 MHz, CDCl<sub>3</sub>) δ 0.47 (m, 6H), 0.80 (t, *J* = 7.9 Hz, 9H), 3.75 (s, 3H), 5.12 (m, 2H), 6.78 (d, *J* = 8.8 Hz, 2H), 7.28 (d, *J* = 8.8 Hz, 2H), 7.34 (s, 5H); <sup>13</sup>C NMR (100 MHz, CDCl<sub>3</sub>) δ 4.9 (3C), 6.7 (3C), 55.8, 63.4, 77.8, 114.6 (2C), 119.1 (2C), 128.61, 128.64 (2C), 128.69 (2C), 131.3, 134.4, 156.5, 165.9; HRMS (ES+) *m/z* calcd for C<sub>22</sub>H<sub>30</sub>NO<sub>3</sub>Si [MH<sup>+</sup>] 384.1995, found 384.1978.

***cis*-(±)-4-*tert*-Butyl-3-*tert*-butyldimethylsilyloxy-1-(4-methoxyphenyl)azetidin-2-one (4d).**

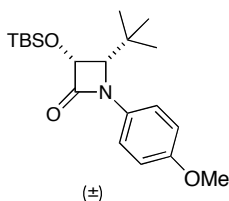

Yield = 95%, yellow solid, mp = 104-106 °C; IR (neat) 2929, 2858, 1735, 1514, 1244 cm<sup>-1</sup>; <sup>1</sup>H NMR (400 MHz, CDCl<sub>3</sub>) δ 0.19 (s, 3H), 0.26 (s, 3H), 0.97 (s, 9H), 1.06 (s, 9H), 3.79 (s, 3H), 4.06 (d, *J* = 5.2 Hz, 1H), 4.98 (d, *J* = 5.2 Hz, 1H), 6.85 (d, *J* = 8.7 Hz, 2H), 7.28 (d, *J* = 8.7 Hz, 2H); <sup>13</sup>C NMR (100 MHz, CDCl<sub>3</sub>) δ -5.0, -4.1, 18.5, 26.1 (3C), 27.4 (3C), 35.4, 55.8, 67.5, 76.6, 114.4 (2C), 121.8 (2C), 131.3, 156.9, 167.9; HRMS (ES+) *m/z* calcd for C<sub>20</sub>H<sub>34</sub>NO<sub>3</sub>Si [MH<sup>+</sup>] 364.2308, found 364.2291.

***cis*-(±)-4-*tert*-Butyl-3-triisopropylsilyloxy-1-(4-methoxyphenyl)azetidin-2-one (4e).**

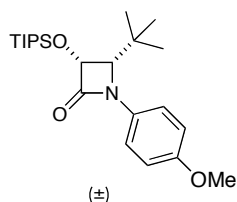

Yield = 92%, colorless oil; IR (neat) 2952, 2867, 1753, 1512, 1245  $\text{cm}^{-1}$ ,  $^1\text{H}$  NMR (500 MHz,  $\text{CDCl}_3$ )  $\delta$  1.07 (s, 9H), 1.12-1.48 (m, 18H), 1.2-1.26 (m, 3H), 3.78 (s, 3H), 4.08 (d,  $J = 5.4$  Hz, 1H), 5.10 (d,  $J = 5.4$  Hz, 1H), 6.85 (d,  $J = 9$  Hz, 2H), 7.30 (d,  $J = 9$  Hz, 2H);  $^{13}\text{C}$  NMR (125 MHz,  $\text{CDCl}_3$ )  $\delta$  12.2 (3C), 18.0 (3C), 18.1 (3C), 27.2 (3C), 35.3, 55.5, 67.5, 76.5, 114.1 (2C), 121.4 (2C), 131.2, 156.6, 167.8; HRMS (ES+)  $m/z$  calcd for  $\text{C}_{23}\text{H}_{40}\text{NO}_3\text{Si}$  [ $\text{MH}^+$ ] 406.2777, found 406.2787.

**Synthesis of *cis*-1-(*tert*-Butoxycarbonyl)-3-trialkylsilyloxy-4-phenyl-azetid-2-ones (5a-c) and *cis*-1-(*tert*-Butoxycarbonyl)-3-*tert*-butyldimethylsilyloxy-4-*tert*-butyl-azetid-2-one (5d).**

A solution of **4** (0.605 mmol) in HPLC grade acetonitrile (8.0 mL) was cooled to  $-20$   $^\circ\text{C}$  (external temperature) for 30 min. An ice-cold solution of CAN (1.20 g, 2.18 mmol) in water (16.0 mL) was added dropwise, carefully ensuring that the internal temperature did not rise above  $-10$   $^\circ\text{C}$ . The reaction mixture was maintained at  $-15$  to  $-10$   $^\circ\text{C}$  for 2 h. The aqueous layer was extracted three times with ethyl ether. The combined organic layers were washed with water,  $\text{NaHCO}_3$ , and brine, dried over  $\text{MgSO}_4$ , and concentrated under reduced pressure to afford a yellow solid. To a solution of the solid thus obtained in  $\text{CH}_2\text{Cl}_2$  (10.0 mL) was added DMAP (14.8 mg, 0.121 mmol), diisopropylethylamine (156 mg, 211  $\mu\text{L}$ , 1.21 mmol) and a solution of di-*tert*-butyl dicarbonate (264 mg, 1.21 mmol) in  $\text{CH}_2\text{Cl}_2$  (1.0 mL) at room temperature. The reaction mixture was stirred for 2 h, diluted with  $\text{CH}_2\text{Cl}_2$ , washed with brine, dried over  $\text{MgSO}_4$ , and concentrated under reduced pressure. Flash chromatography (silica gel) with EtOAc/hexanes afforded the products.

***cis*-(±)-1-(*tert*-Butoxycarbonyl)-3-triisopropylsilyloxy-4-phenylazetid-2-one (5b).<sup>3</sup>**

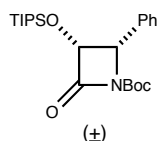

Yield = 42%, colorless oil;  $^1\text{H}$  NMR (400 MHz,  $\text{CDCl}_3$ )  $\delta$  0.87-0.90 (m, 21H), 1.42 (s, 9H), 5.08 (d,  $J = 5.7$  Hz, 1H), 5.17 (d,  $J = 5.7$  Hz, 1H), 7.30-7.37 (m, 5H);  $^{13}\text{C}$  NMR (100 MHz,  $\text{CDCl}_3$ )  $\delta$  12.0 (3C), 17.7 (3C), 17.8 (3C), 28.2 (3C), 62.7, 78.0, 83.7, 128.4 (2C), 128.5 (2C), 128.6, 134.3, 148.3, 166.7; HRMS (ES+)  $m/z$  calcd for  $\text{C}_{23}\text{H}_{41}\text{N}_2\text{O}_4\text{Si}$  [ $\text{MNH}_4^+$ ] 422.2390, found 422.2831.

***cis*-(±)-1-(*tert*-Butoxycarbonyl)-3-triethylsilyloxy-4-phenylazetid-2-one (5c).<sup>4</sup>**

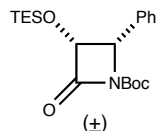

Yield = 53%, colorless oil;  $^1\text{H}$  NMR (400 MHz,  $\text{CDCl}_3$ )  $\delta$  0.37-0.52 (m, 6H), 0.77 (t,  $J = 7.9$  Hz, 9H), 1.40 (s, 9H), 5.04-5.08 (m, 2H), 7.28-7.37 (m, 5H);  $^{13}\text{C}$  NMR (100 MHz,  $\text{CDCl}_3$ )  $\delta$  4.7 (3C), 6.6 (3C), 28.2 (3C), 62.5, 77.6, 83.7, 128.3 (2C), 128.4 (2C), 128.6, 134.3, 148.3, 166.7; HRMS (ES+)  $m/z$  calcd for  $\text{C}_{20}\text{H}_{31}\text{NO}_4\text{SiNa}$  [ $\text{MNa}^+$ ] 400.1920, found 400.1919.

***cis*-(±)-1-(*tert*-Butoxycarbonyl)-3-*tert*-butyldimethylsilyloxy-4-*tert*-butylazetid-2-one (5d).**

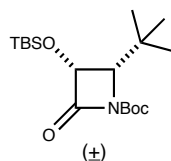

Yield = 62%, colorless oil; IR (neat) 2956, 2931, 2858, 1807, 1730, 1317, 1257, 1155  $\text{cm}^{-1}$ ;  $^1\text{H}$  NMR (400 MHz,  $\text{CDCl}_3$ )  $\delta$  0.15 (s, 3H), 0.21 (s, 3H), 0.93 (s, 9H), 1.08 (s, 9H), 1.57 (s, 9H), 3.90 (d,  $J = 7.5$  Hz, 1H), 4.91 (d,  $J = 7.5$  Hz, 1H);  $^{13}\text{C}$  NMR (100 MHz,  $\text{CDCl}_3$ )  $\delta$  -5.0, -4.3, 18.4, 26.0 (3C), 27.2 (3C), 28.3 (3C), 34.7, 67.0, 76.3, 83.5, 149.6, 168.4; HRMS (ES+)  $m/z$  calcd for  $\text{C}_{18}\text{H}_{35}\text{NO}_4\text{SiNa}$  [ $\text{MNa}^+$ ] 380.2233, found 380.2229.

**cis-(±)-(1-*tert*-Butoxycarbonyl)-3-triisopropylsilyloxy-4-*tert*-butylazetidin-2-one (5e).**

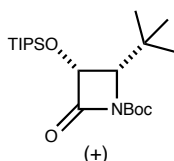

Yield = 55%, colorless oil; IR (neat) 2945, 2893, 2867, 1807, 1728, 1463, 1319, 1255, 1155  $\text{cm}^{-1}$ ;  $^1\text{H}$  NMR (400 MHz,  $\text{CDCl}_3$ )  $\delta$  1.07-1.10 (m, 27H), 1.16-1.20 (m, 3H), 1.50 (s, 9H), 3.89 (d,  $J = 6.5$  Hz, 1H), 5.02 (d,  $J = 6.5$  Hz, 1H);  $^{13}\text{C}$  NMR (100 MHz,  $\text{CDCl}_3$ )  $\delta$  12.1 (3C), 17.8 (3C), 18.0 (3C), 26.9 (3C), 28.1 (3C), 34.5, 66.9, 76.4, 83.2, 149.3, 168.2; HRMS (ES+)  $m/z$  calcd for  $\text{C}_{21}\text{H}_{41}\text{NO}_4\text{SiNa}$  [ $\text{MNa}^+$ ] 422.2703, found 422.2700.

**Synthesis of 2'-*O*-*tert*-Butyldimethylsilyldocetaxel (11).**

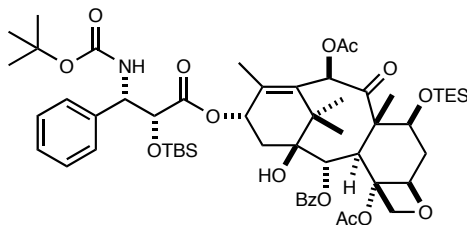

A solution of 2'-*O*-*tert*-butyldimethylsilyldocetaxel (60.0 mg, 0.065 mmol), and TESCl (110  $\mu\text{l}$ , 98.1 mg, 0.651 mmol) in  $\text{CH}_2\text{Cl}_2$  (5.0 mL) was stirred under argon at room temperature for 24 h. The reaction was diluted with  $\text{CH}_2\text{Cl}_2$  and then quenched with water. The aqueous layer was extracted with  $\text{CH}_2\text{Cl}_2$ , and the combined organic layers were washed with brine, dried over  $\text{MgSO}_4$ , and concentrated under reduced pressure to afford a yellow solid. To a solution of the solid thus obtained in pyridine (4.0 mL) under argon was added acetic anhydride (615  $\mu\text{l}$ , 664.6 mg, 6.51 mmol) at 0  $^\circ\text{C}$  under argon. The reaction mixture was warmed to room temperature overnight and then diluted with EtOAc (30 mL), washed with saturated aqueous  $\text{NaHCO}_3$  solution, water and brine, dried over  $\text{MgSO}_4$ , and concentrated under reduced pressure. Flash chromatography (silica gel) with EtOAc/hexanes afforded 67.4 mg (96%) of a colorless solid. The compound showed spectroscopic properties in agreement with the literature.<sup>5</sup>

**Synthesis of 10-Acetyldocetaxel (8) from 11.** To a solution of **11** (30.0 mg, 0.770 mmol) in pyridine (2.0 mL) under argon were added 8 drops of a HF-pyridine solution dropwise at 0  $^\circ\text{C}$  under argon. The reaction mixture was stirred for 30 min at the same temperature, and then

another 10 drops of HF-pyridine solution were added dropwise. The reaction mixture was warmed to room temperature overnight, diluted with EtOAc (30 mL), washed with saturated aqueous NaHCO<sub>3</sub> solution, water and brine, dried over MgSO<sub>4</sub>, and concentrated under reduced pressure. Flash chromatography (silica gel) with EtOAc/hexanes afforded 21.3 mg (90%) of a colorless solid. The compound showed spectroscopic properties in agreement with the data reported.<sup>5</sup>

#### References:

1. Akiyama, T.; Takaya, J.; Kagoshima, H. *Tetrahedron Lett.* **2001**, *42*, 4025-4028.
2. Ojima, I.; Habus, I.; Zhao, M.-Z.; Zucco, M.; Park, Y. H.; Sun, C.-M.; Brigaud, T. *Tetrahedron* **1992**, *48*, 6985-7012.
3. Ojima, I.; Fumero-Oderda, C. L.; Kuduk, S. D.; Ma, Z.-P.; Kirikae, F.; Kirikae, T. *Bioorg. Med. Chem.* **2003**, *11*, 2867-2888.
4. Ojima, I.; Sun, C.-M.; Zucco, M.; Park, Y. H.; Duclos, O.; Kuduk, S. *Tetrahedron Lett.* **1993**, *34*, 4149-4152.
5. Georg, G. I.; Boge, T. C.; Cheruvallath, Z. S.; Harriman, G. C. B.; Hepperle, M.; Park, H.; Himes, R. H. *Bioorg. Med. Chem. Lett.* **1994**, *4*, 335-338.

Current Data Parameters  
 NAME Tx-3-267-H  
 EXPNO 1  
 PROCNO 1

F2 - Acquisition Parameters  
 Date\_ 20050818  
 Time 7.29  
 INSTRUM drx400  
 PROBHD 5 mm QNP 1H/13  
 PULPROG zg30  
 TD 32768  
 SOLVENT CDC13  
 NS 16  
 DS 2  
 SWH 4789.272 Hz  
 FIDRES 0.146157 Hz  
 AQ 3.4210291 sec  
 RG 64  
 DW 104.400 usec  
 DE 5.50 usec  
 TE 296.2 K  
 D1 1.00000000 sec  
 MCREST 0.00000000 sec  
 MCWRK 0.01500000 sec

===== CHANNEL f1 =====  
 NUC1 1H  
 P1 9.35 usec  
 PL1 -4.00 dB  
 SFO1 400.1320007 MHz

F2 - Processing parameters  
 SI 32768  
 SF 400.1300000 MHz  
 WDW EM  
 SSB 0  
 LB 0.30 Hz  
 GB 0  
 PC 1.00

1D NMR plot parameters  
 CX 20.00 cm  
 CY 3.00 cm  
 FIP 10.985 ppm  
 F1 4395.28 Hz  
 F2P -0.985 ppm  
 F2 -393.99 Hz  
 PPMCM 0.59846 ppm/cm  
 HZCM 239.46359 Hz/cm

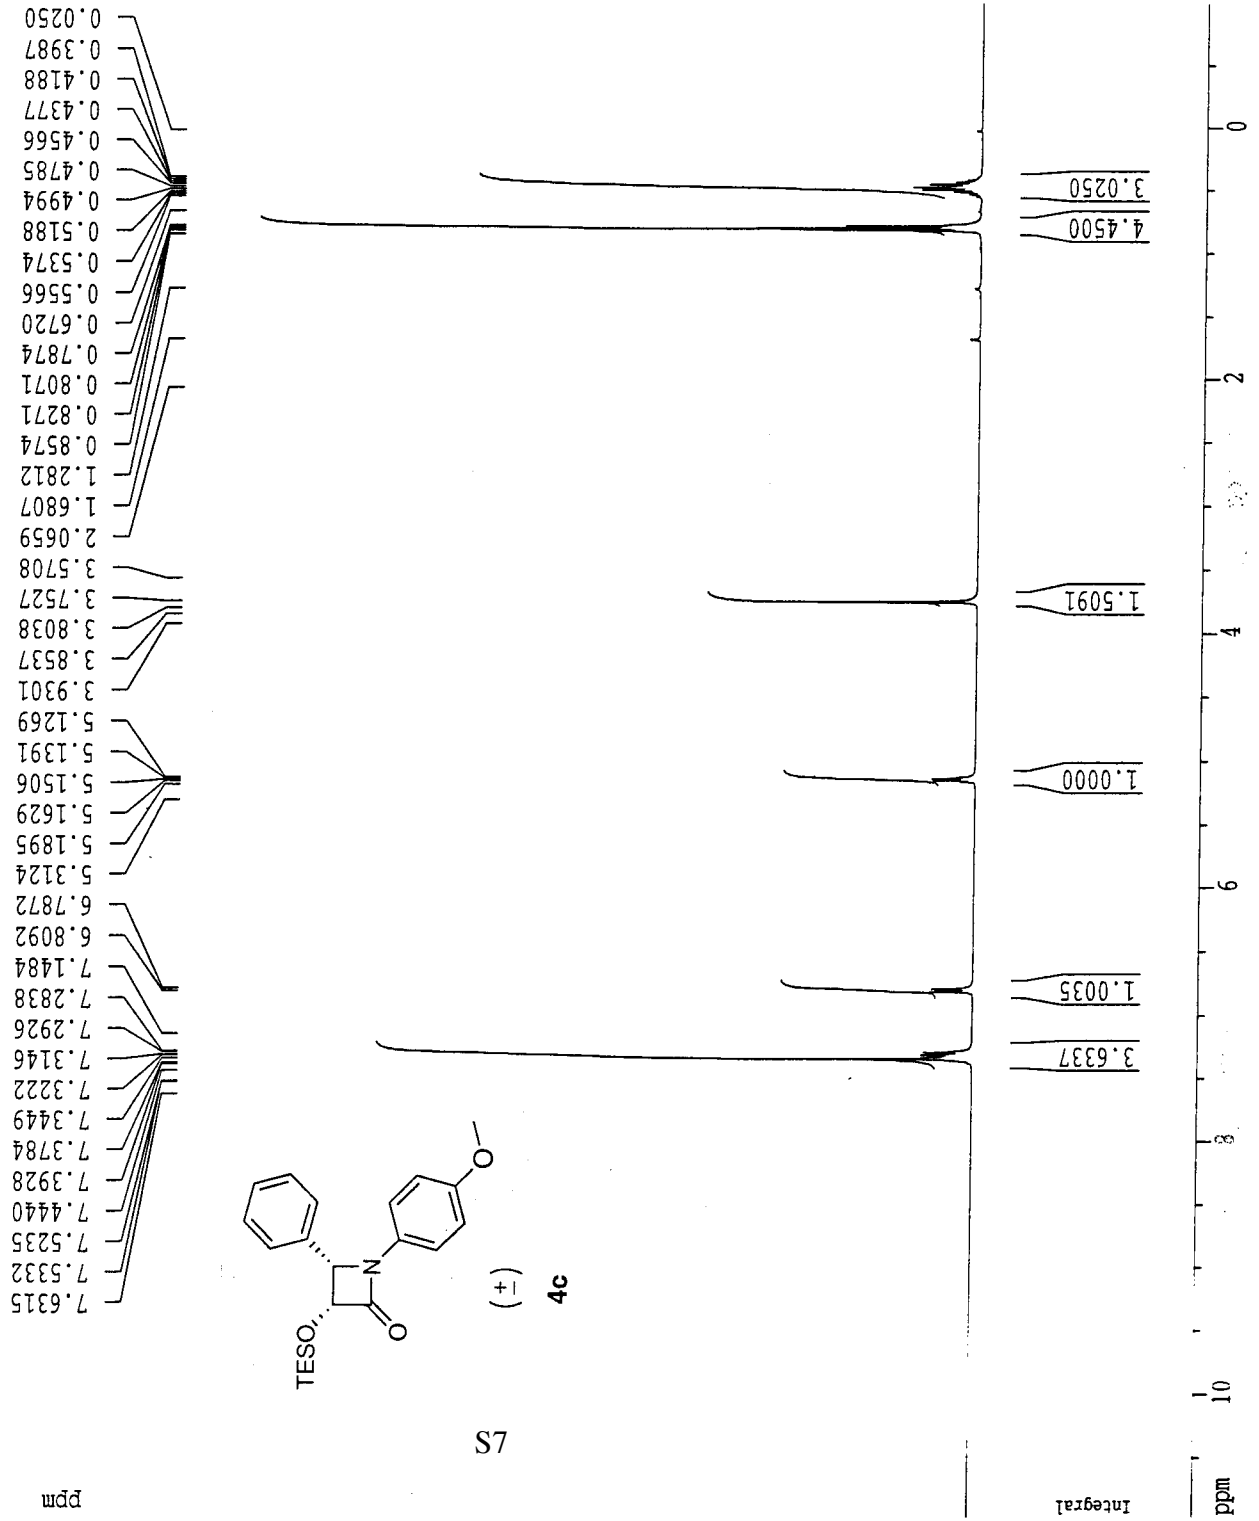

LS

ppm

Integral

ppm

Current Data Parameters  
 NAME Tx-3-267-C  
 EXPNO 1  
 PROCNO 1

F2 - Acquisition Parameters  
 Date\_ 20050818  
 Time 7.38  
 INSTRUM drx400  
 PROBHD 5 mm QNP 1H/13  
 PULPROG zgpg30  
 TD 65536  
 SOLVENT CDCl3  
 NS 298  
 DS 4  
 SWH 23148.148 Hz  
 FIDRES 0.353213 Hz  
 AQ 1.4156276 sec  
 RG 3251  
 DW 21.600 usec  
 DE 5.50 usec  
 TE 296.2 K  
 DI 0.15000001 sec  
 d11 0.03000000 sec  
 DELTA 0.05000000 sec  
 MCREST 0.00000000 sec  
 MCONRK 0.01500000 sec

===== CHANNEL f1 =====  
 NUC1 13C  
 P1 11.25 usec  
 PL1 2.00 dB  
 SFO1 100.6232933 MHz

===== CHANNEL f2 =====  
 CPDPRG2 waitz16  
 NUC2 1H  
 PCPD2 100.00 usec  
 PL2 -4.00 dB  
 PL12 16.58 dB  
 PL13 17.00 dB  
 SFO2 400.1316005 MHz

F2 - Processing parameters  
 SI 65536  
 SF 100.6127290 MHz  
 WDW EM  
 SSB 0  
 LB 1.00 Hz  
 GB 0  
 FC 1.40

1D NMR plot parameters  
 CX 20.00 cm  
 CY 12.50 cm  
 F1P 215.000 ppm  
 F1 21631.74 Hz  
 F2P -5.000 ppm  
 F2 -503.06 Hz  
 PPMCM 11.00000 ppm/cm  
 HZCM 1106.73999 Hz/cm

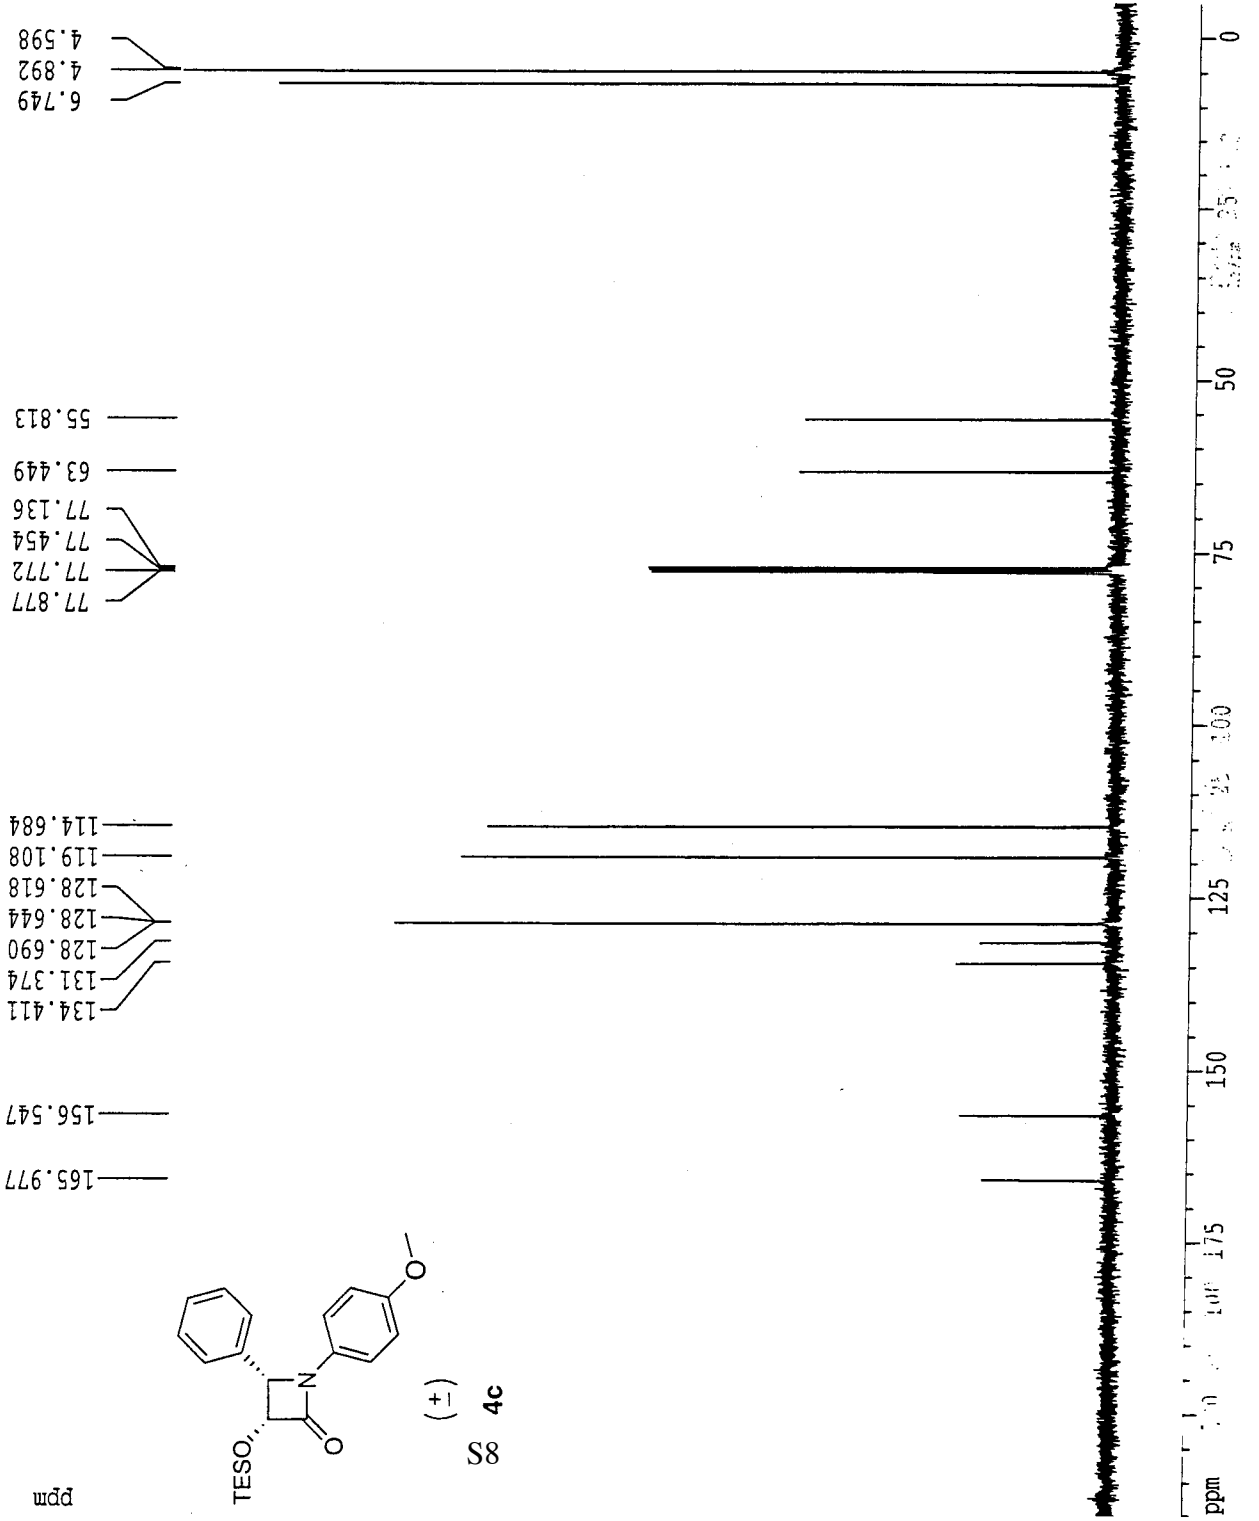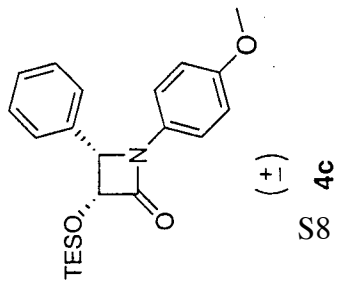

ppm



Current Data Parameters  
 NAME Tx-3-265-1-H  
 EXPNO 1  
 PROCNO 1

F2 - Acquisition Parameters

Date\_ 20050822  
 Time 12.35  
 INSTRUM drx400  
 PROBHD 5 mm QNP 1H/13  
 PULPROG zg30  
 TD 32768  
 SOLVENT CDC13  
 NS 16  
 DS 2  
 SWH 4789.272 Hz  
 FIDRES 0.146157 Hz  
 AQ 3.4210291 sec  
 RG 64  
 DW 104.400 usec  
 DE 5.50 usec  
 TE 296.2 K  
 D1 1.00000000 sec  
 MCREST 0.00000000 sec  
 MCWREK 0.01500000 sec

===== CHANNEL f1 =====  
 NUC1 1H  
 P1 9.35 usec  
 PL1 -4.00 dB  
 SF01 400.1320007 MHz

F2 - Processing parameters  
 SI 32768  
 SF 400.1300000 MHz  
 WDW EM  
 SSB 0  
 LB 0.30 Hz  
 GB 0  
 PC 1.00

1D NMR plot parameters  
 CX 20.00 cm  
 CY 6.00 cm  
 F1P 10.985 ppm  
 F1 4395.28 Hz  
 F2P -0.985 ppm  
 F2 -393.99 Hz  
 PPMCH 0.59846 ppm/cm  
 HZCM 239.46359 Hz/cm

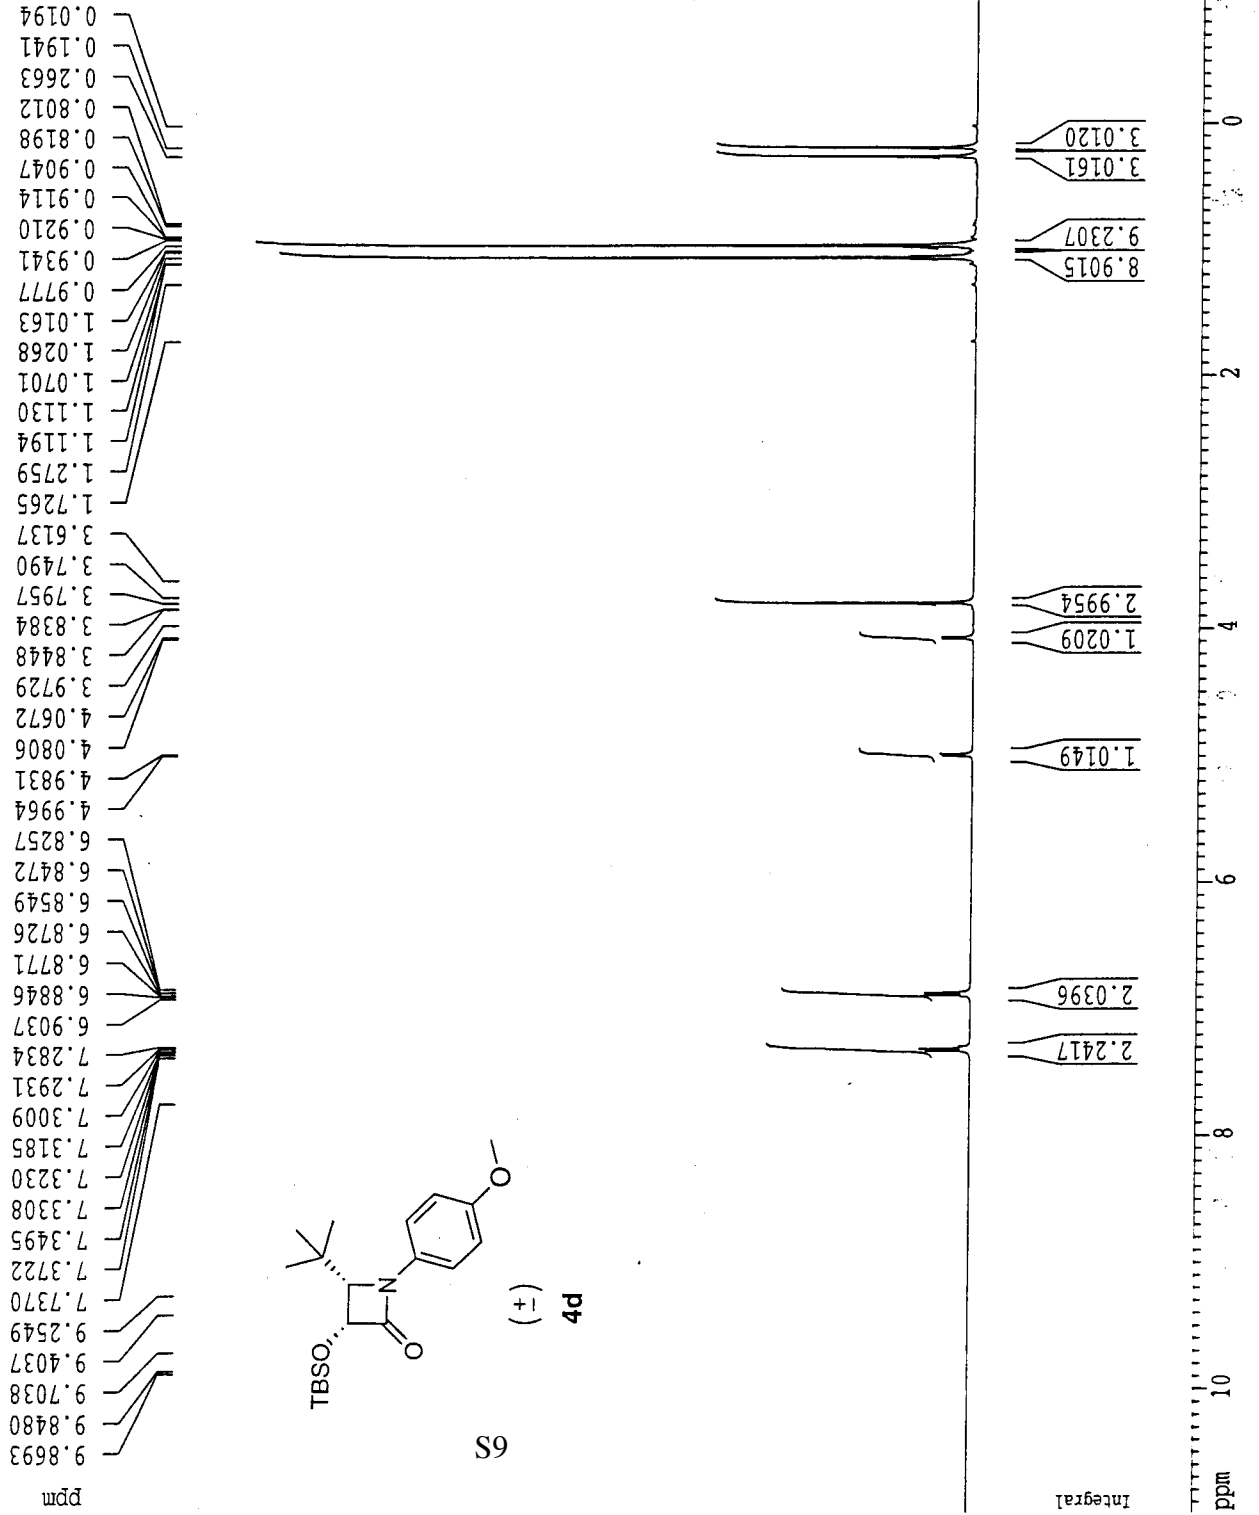

6s

4d

Integral

ppm

Current Data Parameters  
 NAME TX-3-265-1-C  
 EXPNO 1  
 PROCNO 1

F2 - Acquisition Parameters  
 Date\_ 20050822  
 Time 12.42  
 INSTRUM drx400  
 PROBHD 5 mm QNP 1H/13  
 PULPROG zgpg30  
 TD 65536  
 SOLVENT CDCl3  
 NS 220  
 DS 4  
 SWH 23148.148 Hz  
 FIDRES 0.353213 Hz  
 AQ 1.4156276 sec  
 RG 4096  
 DW 21.600 usec  
 DE 5.50 usec  
 TE 296.2 K  
 D1 0.15000001 sec  
 d11 0.03000000 sec  
 DELTA 0.05000000 sec  
 MCREST 0.00000000 sec  
 MCWRK 0.01500000 sec

===== CHANNEL f1 =====  
 NUC1 13C  
 P1 11.25 usec  
 PL1 2.00 dB  
 SFO1 100.6232933 MHz

===== CHANNEL f2 =====  
 CPDPRG2 waltz16  
 NUC2 1H  
 PCPD2 100.00 usec  
 PL2 -4.00 dB  
 PL12 16.58 dB  
 PL13 17.00 dB  
 SFO2 400.1316005 MHz

F2 - Processing parameters  
 SI 65536  
 SF 100.6127290 MHz  
 WDW EM  
 SSB 0  
 LB 1.00 Hz  
 GB 0  
 PC 1.40

ID NMR plot parameters  
 CX 20.00 cm  
 CY 6.00 cm  
 F1 22138.42 Hz  
 F2 -10.036 ppm  
 F2 -1009.73 Hz  
 PRMCK 11.50359 ppm/cm  
 HZCM 1157.40747 Hz/cm

18.502  
 26.141  
 27.477  
 35.424  
 55.836  
 67.543  
 76.622  
 77.137  
 77.455  
 77.773  
 114.436  
 121.803  
 131.333  
 156.966  
 167.926

-5.001  
 -4.157

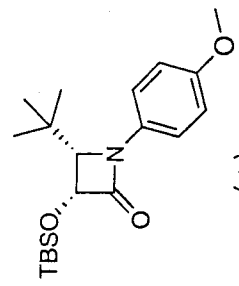

(±) 4d

01S

ppm

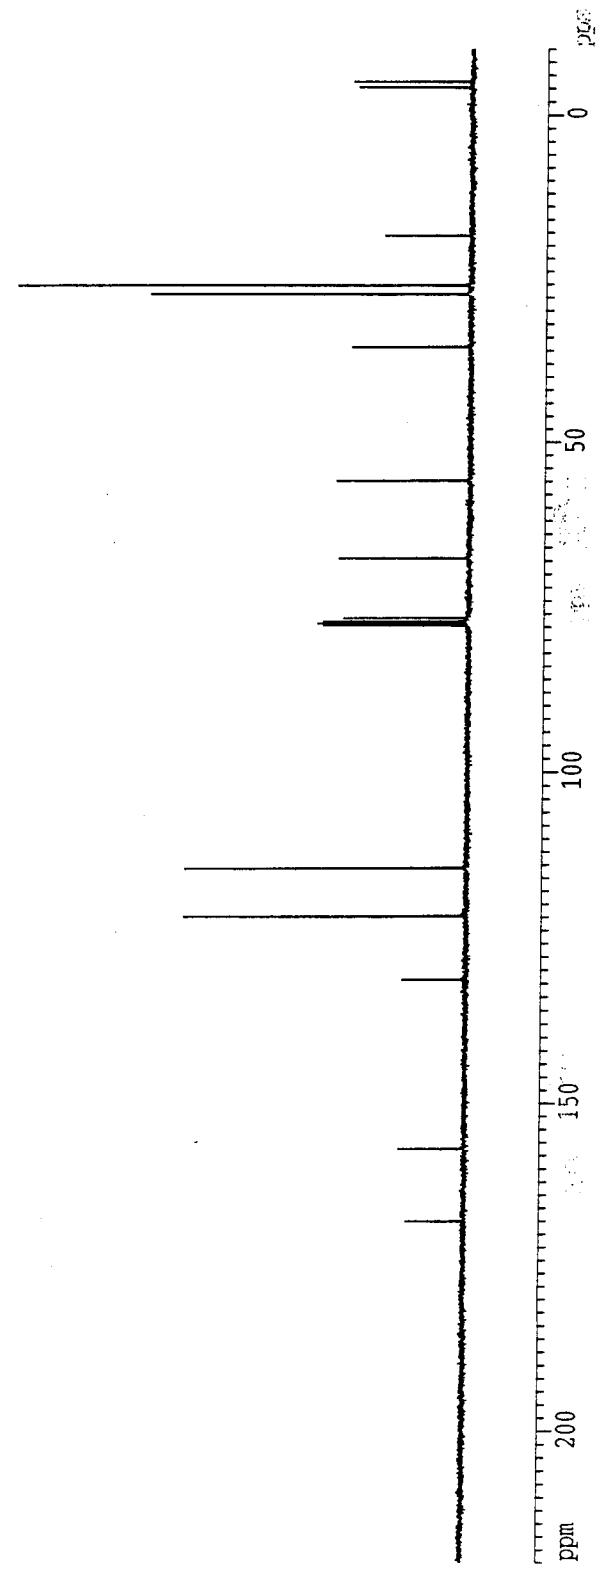

ppm

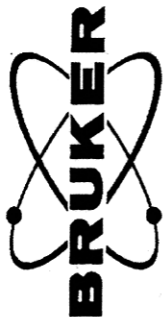

PROTON CDCl3 opt/topspin hge 2

Current Data Parameters  
NAME HB\_M 255\_1  
EXPNO 1  
PROCNO 1

F2 - Acquisition Parameters  
Date\_ 20060918  
Time 14.11  
INSTRUM spect  
PROBHD 5 mm CPDUL 13C  
PULPROG zg30  
TD 65536  
SOLVENT CDCl3  
NS 16  
DS 2  
SWH 10330.578 Hz  
FIDRES 0.157632 Hz  
AQ 3.1720407 sec  
RG 32  
DW 48.400 usec  
DE 6.00 usec  
TE 298.0 K  
D1 1.0000000 sec  
TD0 1

==== CHANNEL f1 =====  
NUC1 1H  
P1 15.00 usec  
PL1 1.60 dB  
SF01 500.1330885 MHz

F2 - Processing parameters  
SI 32768  
SF 500.1300122 MHz  
WDW EM  
SSB 0  
LB 0.30 Hz  
GB 0  
PC 1.00

7.32  
7.31  
7.31  
7.31  
7.31  
7.30  
7.30  
7.29  
7.26  
6.86  
6.85  
6.85  
6.84  
6.84  
5.83  
5.11  
5.10  
4.09  
4.08  
3.78

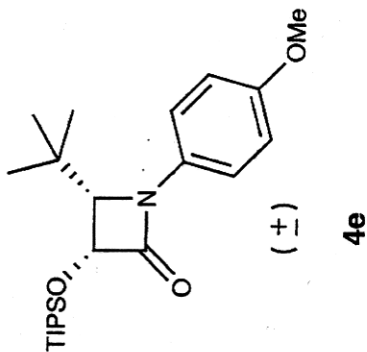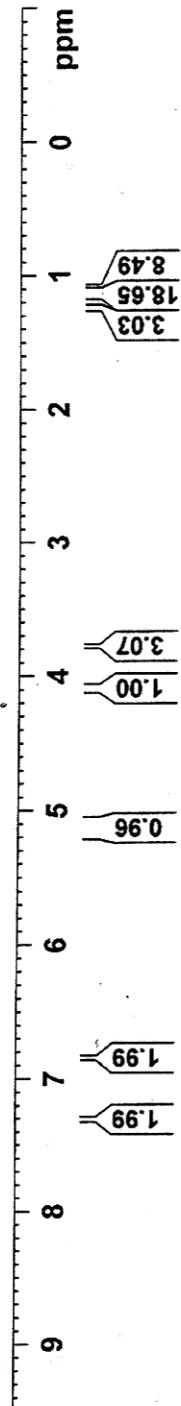

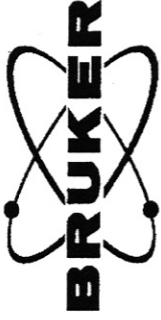

C13CPD CDCl3 opt/topspin hge 2

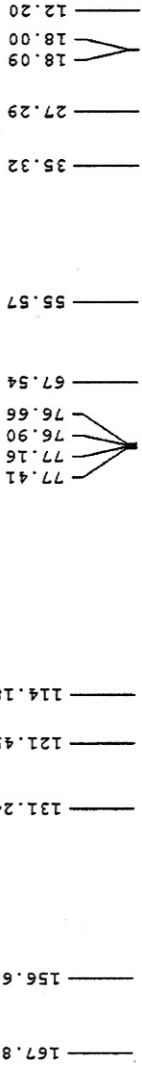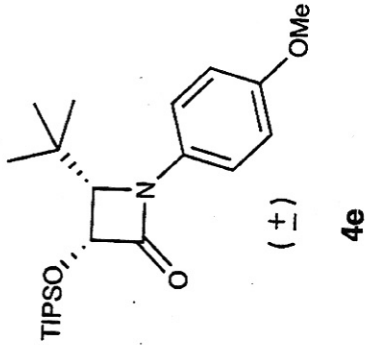

Current Data Parameters  
 NAME HB\_M\_255\_1  
 EXPNO 2  
 PROCNO 1

F2 - Acquisition Parameters  
 Date\_ 20060918  
 Time\_ 14.33  
 INSTRUM spect  
 PROBD 5 mm CPDUL 13C  
 PULPROG zgpg30  
 TD 65536  
 SOLVENT CDCl3  
 NS 1024  
 DS 4  
 SWH 30030.029 Hz  
 FIDRES 0.458222 Hz  
 AQ 1.0912410 sec  
 RG 11585.2  
 DW 16.650 usec  
 DE 6.00 usec  
 TE 298.0 K  
 DI 0.15000001 sec  
 d11 0.03000000 sec  
 DELTA 0.05000000 sec  
 TDO 1

==== CHANNEL f1 =====  
 NUC1 13C  
 P1 9.80 usec  
 PL1 3.80 dB  
 SFO1 125.7703643 MHz

==== CHANNEL f2 =====  
 CPDPRG2 waltz16  
 NUC2 1H  
 PCPD2 80.00 usec  
 PL2 1.60 dB  
 PL12 16.14 dB  
 PL13 10.00 dB  
 SFO2 500.1320005 MHz

F2 - Processing parameters  
 SI 32768  
 SF 125.7577748 MHz  
 WDW EM  
 SSB 0  
 LB 1.00 Hz  
 GB 0  
 PC 1.40

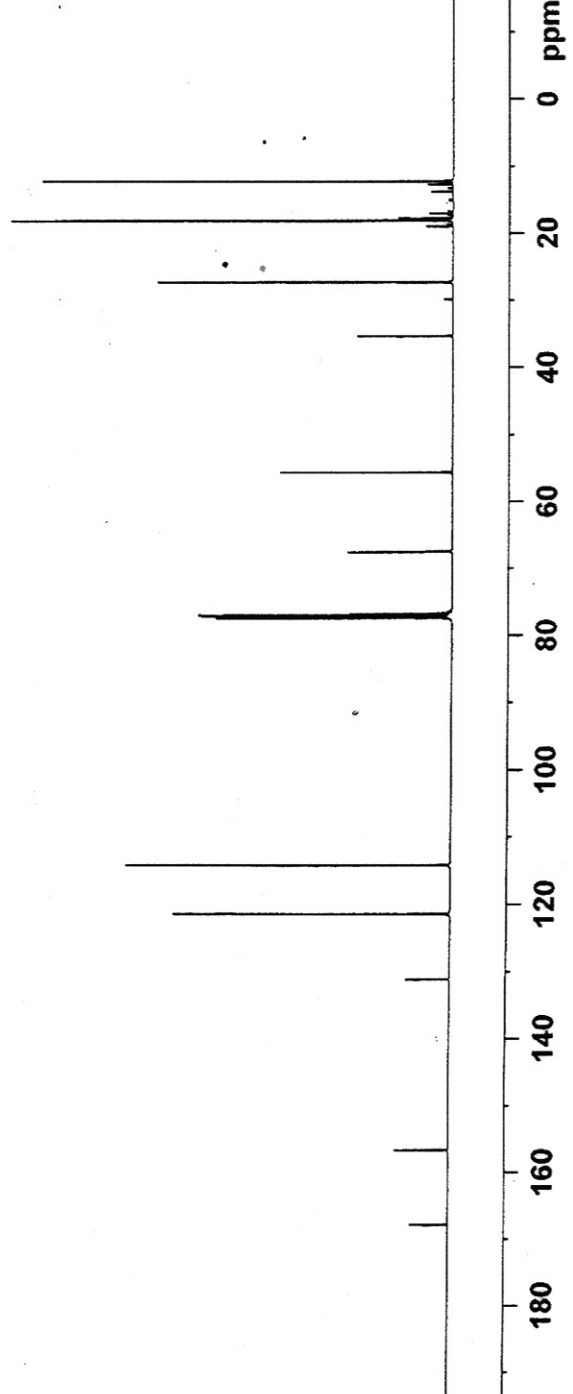

Current Data Parameters  
 NAME TX-3-85-H  
 EXPNO 1  
 PROCNO 1

F2 - Acquisition Parameters  
 Date\_ 20050113  
 Time 14.25  
 INSTRUM drx400  
 PROBHD 5 mm QNP 1H/13  
 PULPROG zg30  
 TD 32768  
 SOLVENT CDC13  
 NS 16  
 DS 2  
 SWH 4789.272 Hz  
 FIDRES 0.146157 Hz  
 AQ 3.4210291 sec  
 RG 143.7  
 DM 104.400 usec  
 DE 5.50 usec  
 TE 294.2 K  
 D1 1.0000000 sec  
 MCREST 0.0000000 sec  
 MCWRK 0.0150000 sec

=====  
 CHANNEL f1  
 NUC1 1H  
 P1 9.35 usec  
 PL1 -4.00 dB  
 SF01 400.1320007 MHz

F2 - Processing parameters  
 SI 32768  
 SF 400.1300000 MHz  
 WDW EM  
 SSB 0  
 LB 0.30 Hz  
 GB 0  
 PC 1.00

1D NMR plot parameters  
 CX 20.00 cm  
 CY 12.50 cm  
 F1P 11.000 ppm  
 F1 4401.43 Hz  
 F2P -1.000 ppm  
 F2 -400.13 Hz  
 PPMCM 0.60000 ppm/cm  
 HZCM 240.07800 Hz/cm

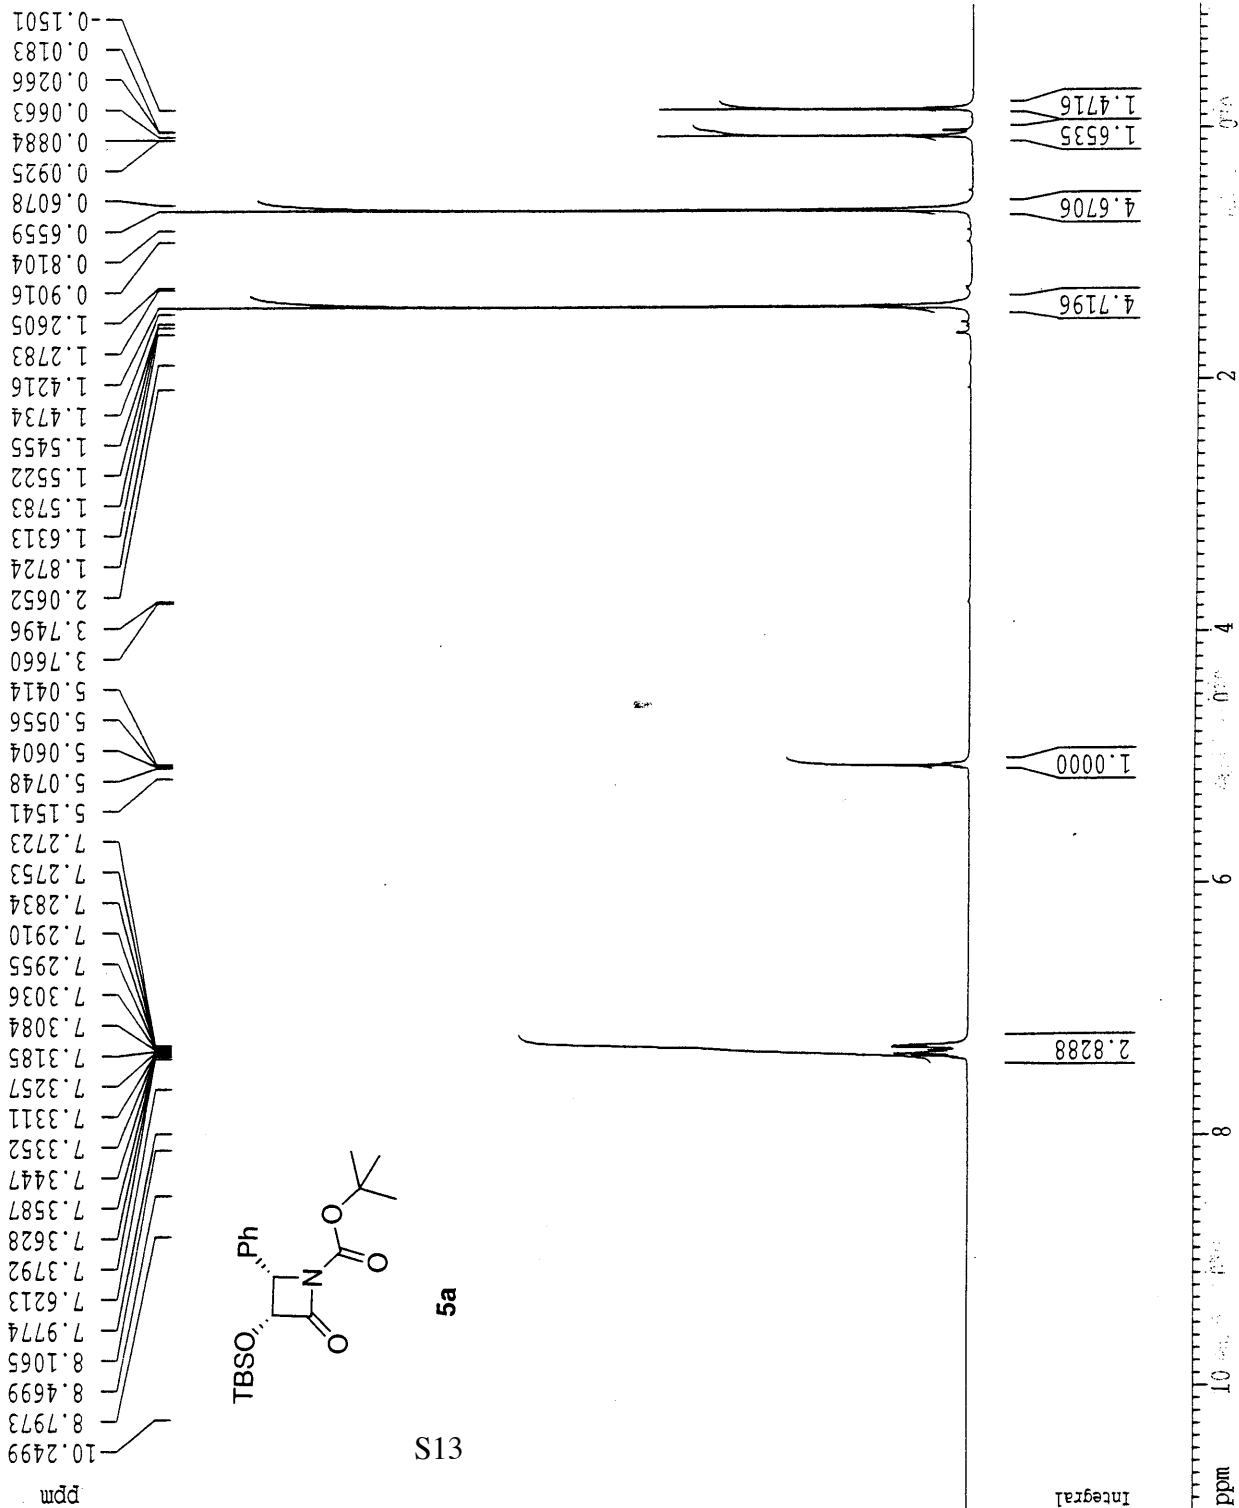

Current Data Parameters  
 NAME TX-3-85-C  
 EXPNO 1  
 PROCNO 1

F2 - Acquisition Parameters  
 Date\_ 20050113  
 Time 14.27  
 INSTRUM drx400  
 PROBHD 5 mm QNP 1H/13  
 PULPROG zgpg30  
 TD 65536  
 SOLVENT CDCl3  
 NS 130  
 DS 4  
 SWH 23148.148 Hz  
 FIDRES 0.353213 Hz  
 AQ 1.4156276 sec  
 RG 5160.6  
 DW 21.600 usec  
 DE 5.50 usec  
 TE 294.2 K  
 D1 0.15000001 sec  
 d11 0.03000000 sec  
 DELTA 0.05000000 sec  
 MCREST 0.00000000 sec  
 MCWRR 0.01500000 sec

===== CHANNEL f1 =====  
 NUC1 13C  
 P1 11.25 usec  
 PL1 2.00 dB  
 SF01 100.6232933 MHz

===== CHANNEL f2 =====  
 CPDPRG2 waltz16  
 NUC2 1H  
 PCPD2 100.00 usec  
 PL2 -4.00 dB  
 PL12 16.58 dB  
 PL13 17.00 dB  
 SF02 400.1316005 MHz

F2 - Processing parameters  
 SI 65536  
 SF 100.6127290 MHz  
 WDW EM  
 SSB 0  
 LB 1.00 Hz  
 GB 0  
 PC 1.40

ID NMR plot parameters  
 CX 20.00 cm  
 CY 12.50 cm  
 FLP 215.000 ppm  
 F1 21631.74 Hz  
 F2P -5.000 ppm  
 F2 -503.06 Hz  
 FWHM 11.00000 Hz/cm  
 SCA 1106.73999 Hz/cm

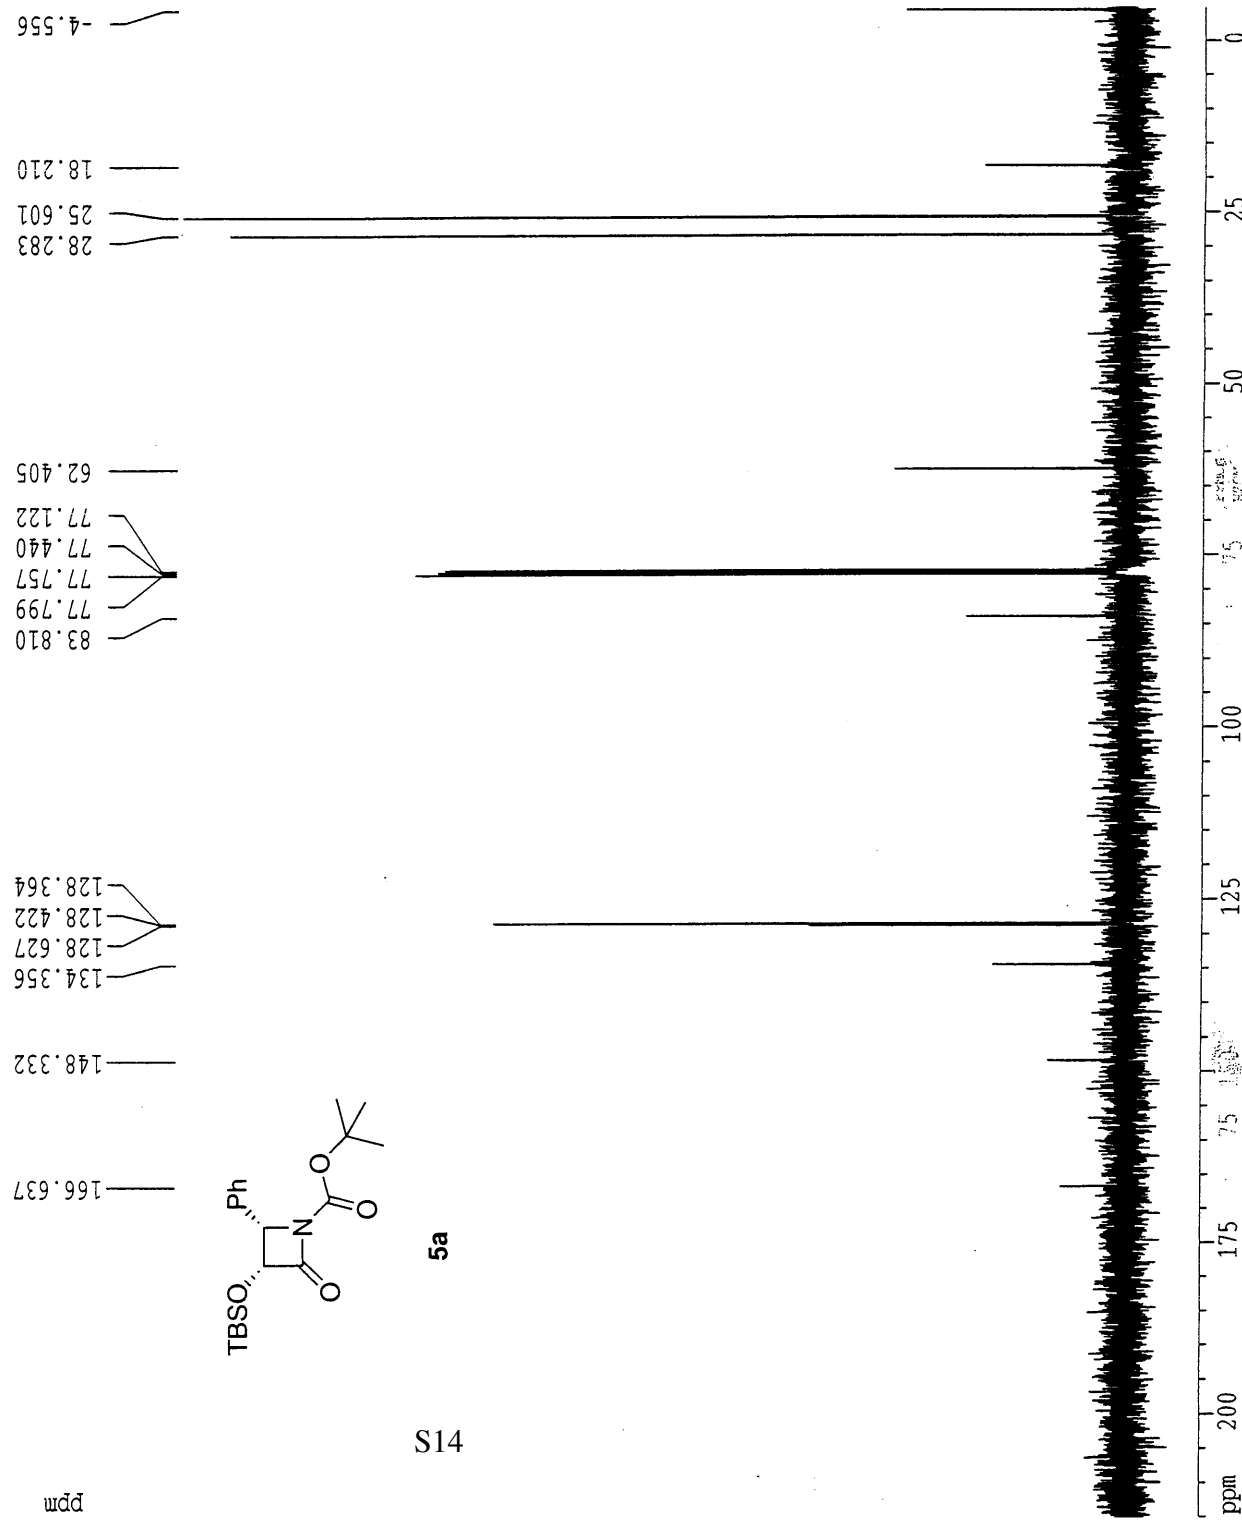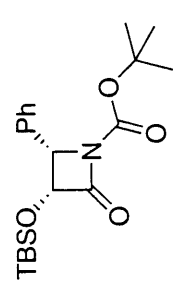

5a

41S

ppm

Current Data Parameters  
 NAME TX-3-85-C  
 EXPNO 1  
 PROCNO 1

F2 - Acquisition Parameters  
 Date\_ 20050113  
 Time 14.27  
 INSTRUM drx400  
 PROBHD 5 mm QNP 1H/13  
 PULPROG zgpg30  
 TD 65536  
 SOLVENT CDCl3  
 NS 130  
 DS 4  
 SWH 23148.148 Hz  
 FIDRES 0.353213 Hz  
 AQ 1.4156276 sec  
 RG 5160.6  
 DW 21.600 usec  
 DE 5.50 usec  
 TE 294.2 K  
 DI 0.15000001 sec  
 d11 0.03000000 sec  
 DELTA 0.05000000 sec  
 MCREST 0.00000000 sec  
 MCMRK 0.01500000 sec

===== CHANNEL f1 =====  
 NUC1 13C  
 P1 11.25 usec  
 PL1 2.00 dB  
 SF01 100.6232933 MHz

===== CHANNEL f2 =====  
 CPDPRG2 waltz16  
 NUC2 1H  
 PCPD2 100.00 usec  
 PL2 -4.00 dB  
 PL12 16.58 dB  
 PL13 17.00 dB  
 SF02 400.1316005 MHz

F2 - Processing parameters  
 SI 65536  
 SF 100.6127290 MHz  
 WDW EM  
 SSB 0  
 LB 1.00 Hz  
 GB 0  
 PC 1.40

1D NMR plot parameters  
 CX 20.00 cm  
 CY 12.50 cm  
 F1P 90.621 ppm  
 F1 9117.58 Hz  
 F2P -6.867 ppm  
 F2 -690.96 Hz  
 PPMCM 4.87440 ppm/cm  
 HZCM 490.42688 Hz/cm

5.0685  
 4.5560

18.2103  
 25.6012  
 28.2832

62.4049  
 77.1224  
 77.4399  
 77.7574  
 77.7994  
 83.8097

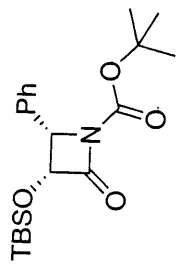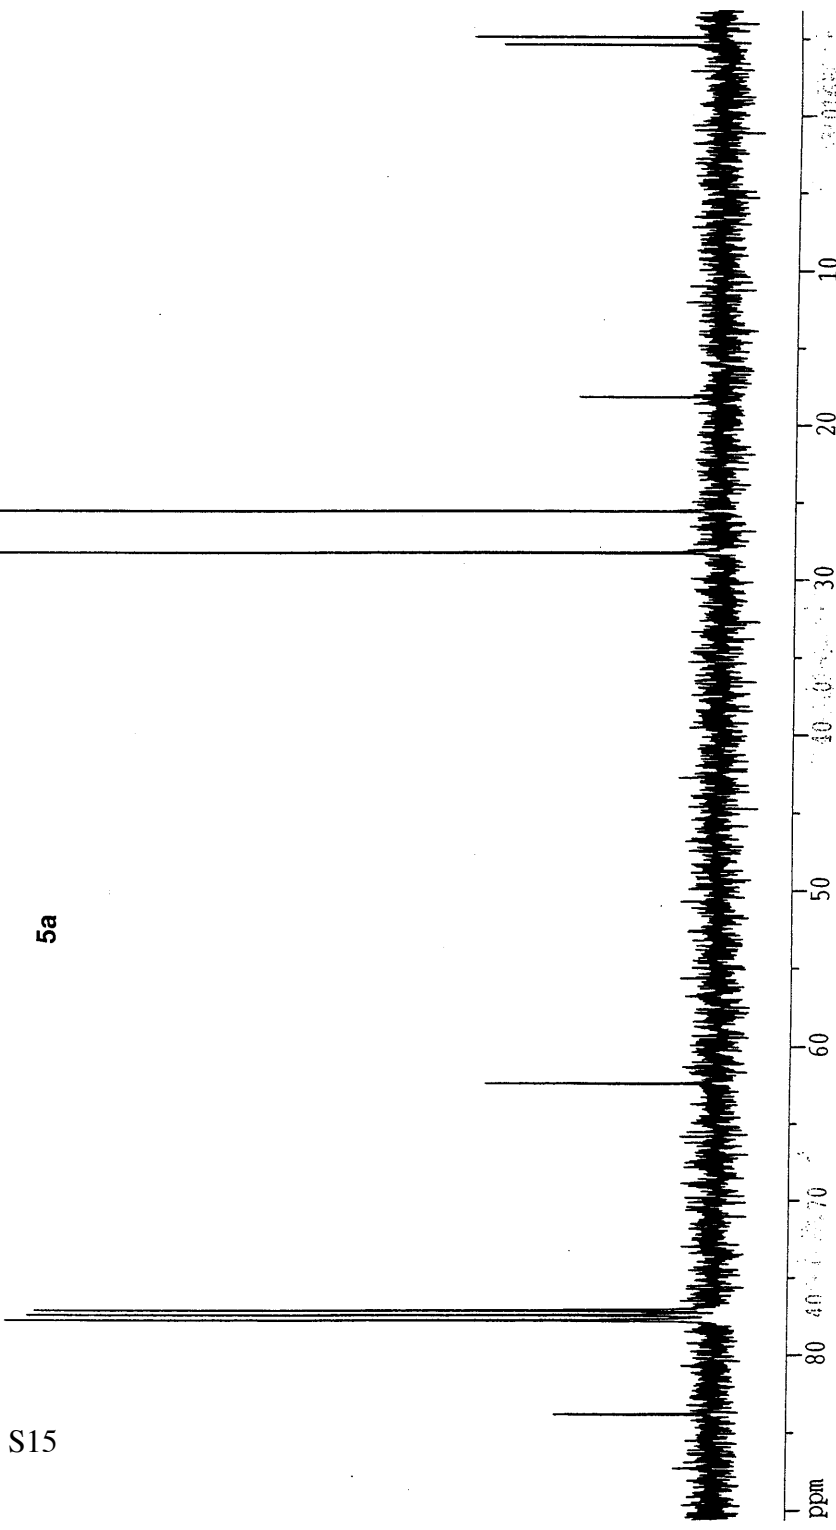

S15

Current Data Parameters  
 TX-3-149-H  
 EXPNO 1  
 PROCNO 1

F2 - Acquisition Parameters  
 Date\_ 20050314  
 Time 10.45  
 INSTRUM dx400  
 PROBHD 5 mm QNP 1H/13  
 PULPROG zg30  
 TD 32768  
 SOLVENT CDCl3  
 NS 16  
 DS 2  
 SWH 4789.272 Hz  
 FIDRES 0.146157 Hz  
 AQ 3.4210291 sec  
 RG 64  
 DW 104.400 usec  
 DE 5.50 usec  
 TE 294.2 K  
 D1 1.0000000 sec  
 MCREST 0.0000000 sec  
 MCWRK 0.0150000 sec

===== CHANNEL f1 =====  
 NUC1 1H  
 P1 9.35 usec  
 PL1 -4.00 dB  
 SFO1 400.1320007 MHz

F2 - Processing parameters  
 SI 32768  
 SF 400.1300000 MHz  
 WDW EM  
 SSB 0  
 LB 0.30 Hz  
 GB 0  
 PC 1.00

1D NMR plot parameters  
 CX 20.00 cm  
 CY 12.50 cm  
 F1P 11.000 ppm  
 F1 4401.43 Hz  
 F2P -1.000 ppm  
 F2 -400.13 Hz  
 PPMCM 0.60000 ppm/cm  
 HZCM 240.07800 Hz/cm

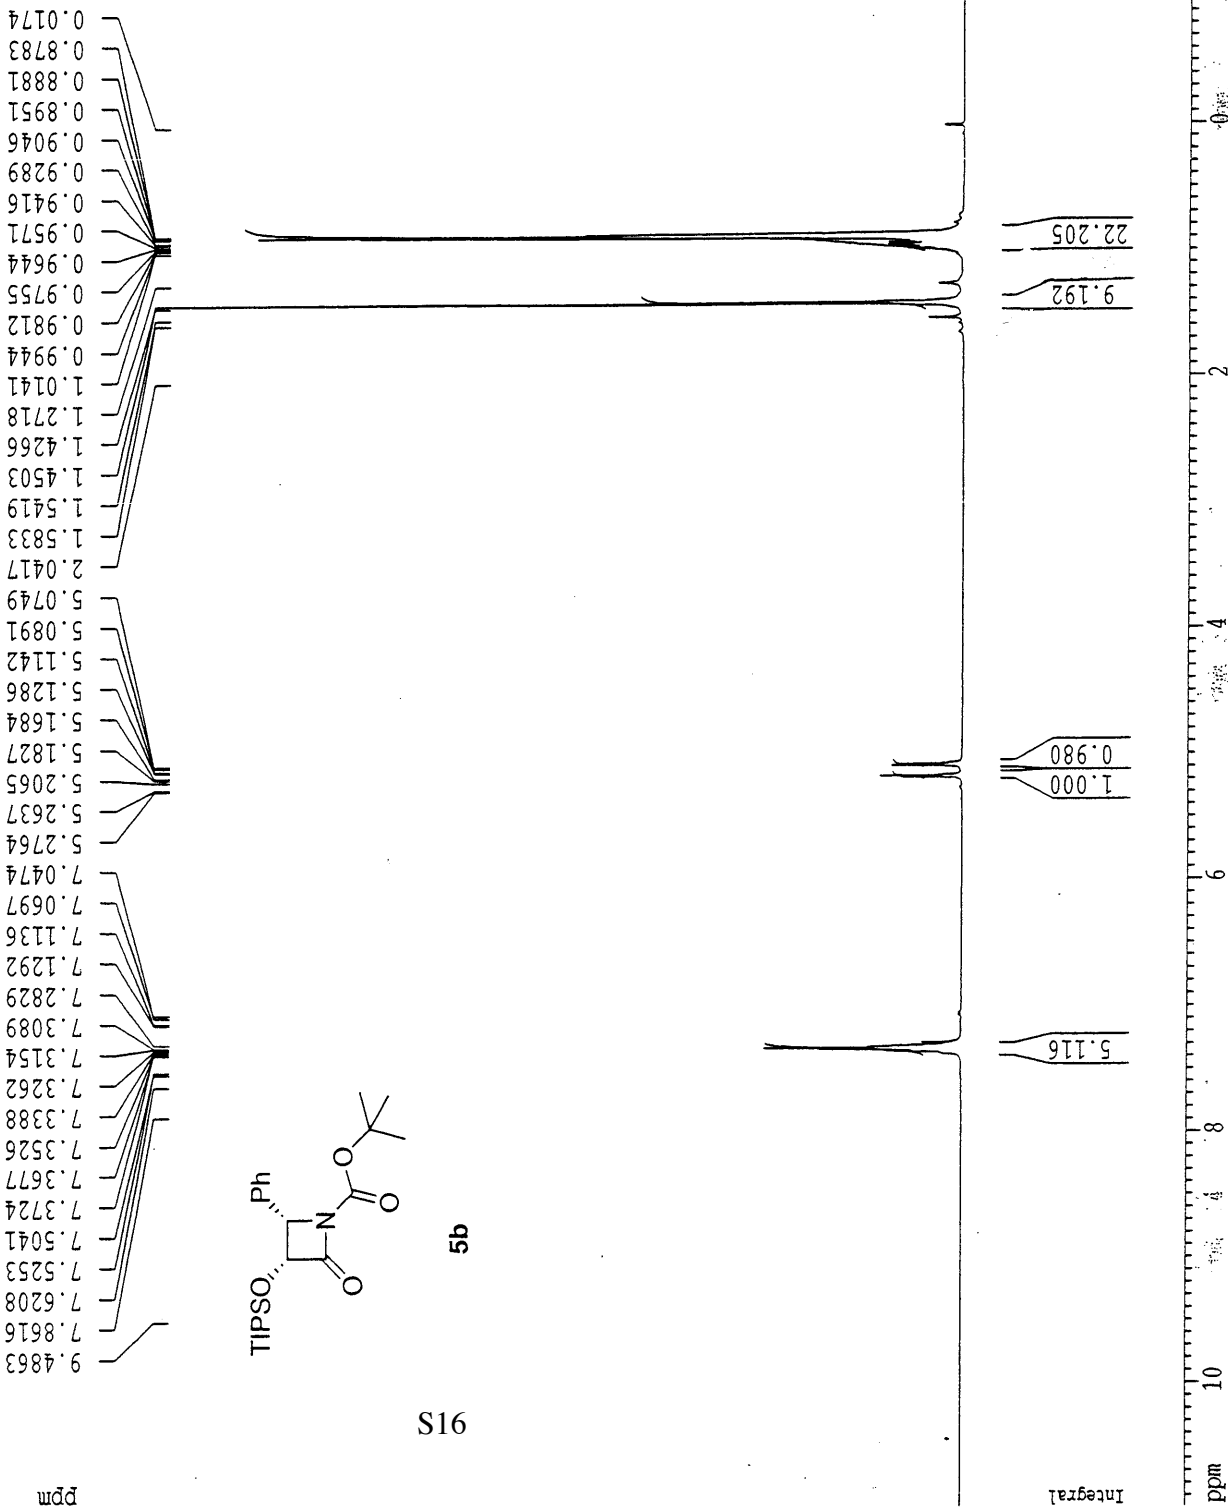



Current Data Parameters  
 NAME TX-3-149-C  
 EXPNO 1  
 PROCNO 1

F2 - Acquisition Parameters  
 Date\_ 20050314  
 Time 10.47  
 INSTRUM drx400  
 PROBHD 5 mm QNP 1H/13  
 PULPROG zgpg30  
 TD 65536  
 SOLVENT CDCl3  
 NS 205  
 DS 4  
 SWH 23148.148 Hz  
 FIDRES 0.353213 Hz  
 AQ 1.4156276 sec  
 RG 3649.1  
 DW 21.600 usec  
 DE 5.50 usec  
 TE 294.2 K  
 D1 0.15000001 sec  
 d11 0.03000000 sec  
 DELTA 0.05000000 sec  
 MCREST 0.00000000 sec  
 MCWRK 0.01500000 sec

==== CHANNEL f1 =====  
 NUC1 13C  
 P1 11.25 usec  
 PL1 2.00 dB  
 SF01 100.6232933 MHz

==== CHANNEL f2 =====  
 CPDPRG2 waitz16  
 NUC2 1H  
 PCPD2 100.00 usec  
 PL2 -4.00 dB  
 PL12 16.58 dB  
 PL13 17.00 dB  
 SF02 400.1316005 MHz

F2 - Processing parameters  
 SI 65536  
 SF 100.6127290 MHz  
 WDM EN  
 SSB 0  
 LB 1.00 Hz  
 GB 0  
 PC 1.40

ID NMR plot parameters  
 CX 20.00 cm  
 CY 12.50 cm  
 F1P 215.000 ppm  
 F1 21631.74 Hz  
 F2P -5.000 ppm  
 F2 -503.06 Hz  
 PPM0 11.00000 ppm/cm  
 PPM1 1106.73999 Hz/cm

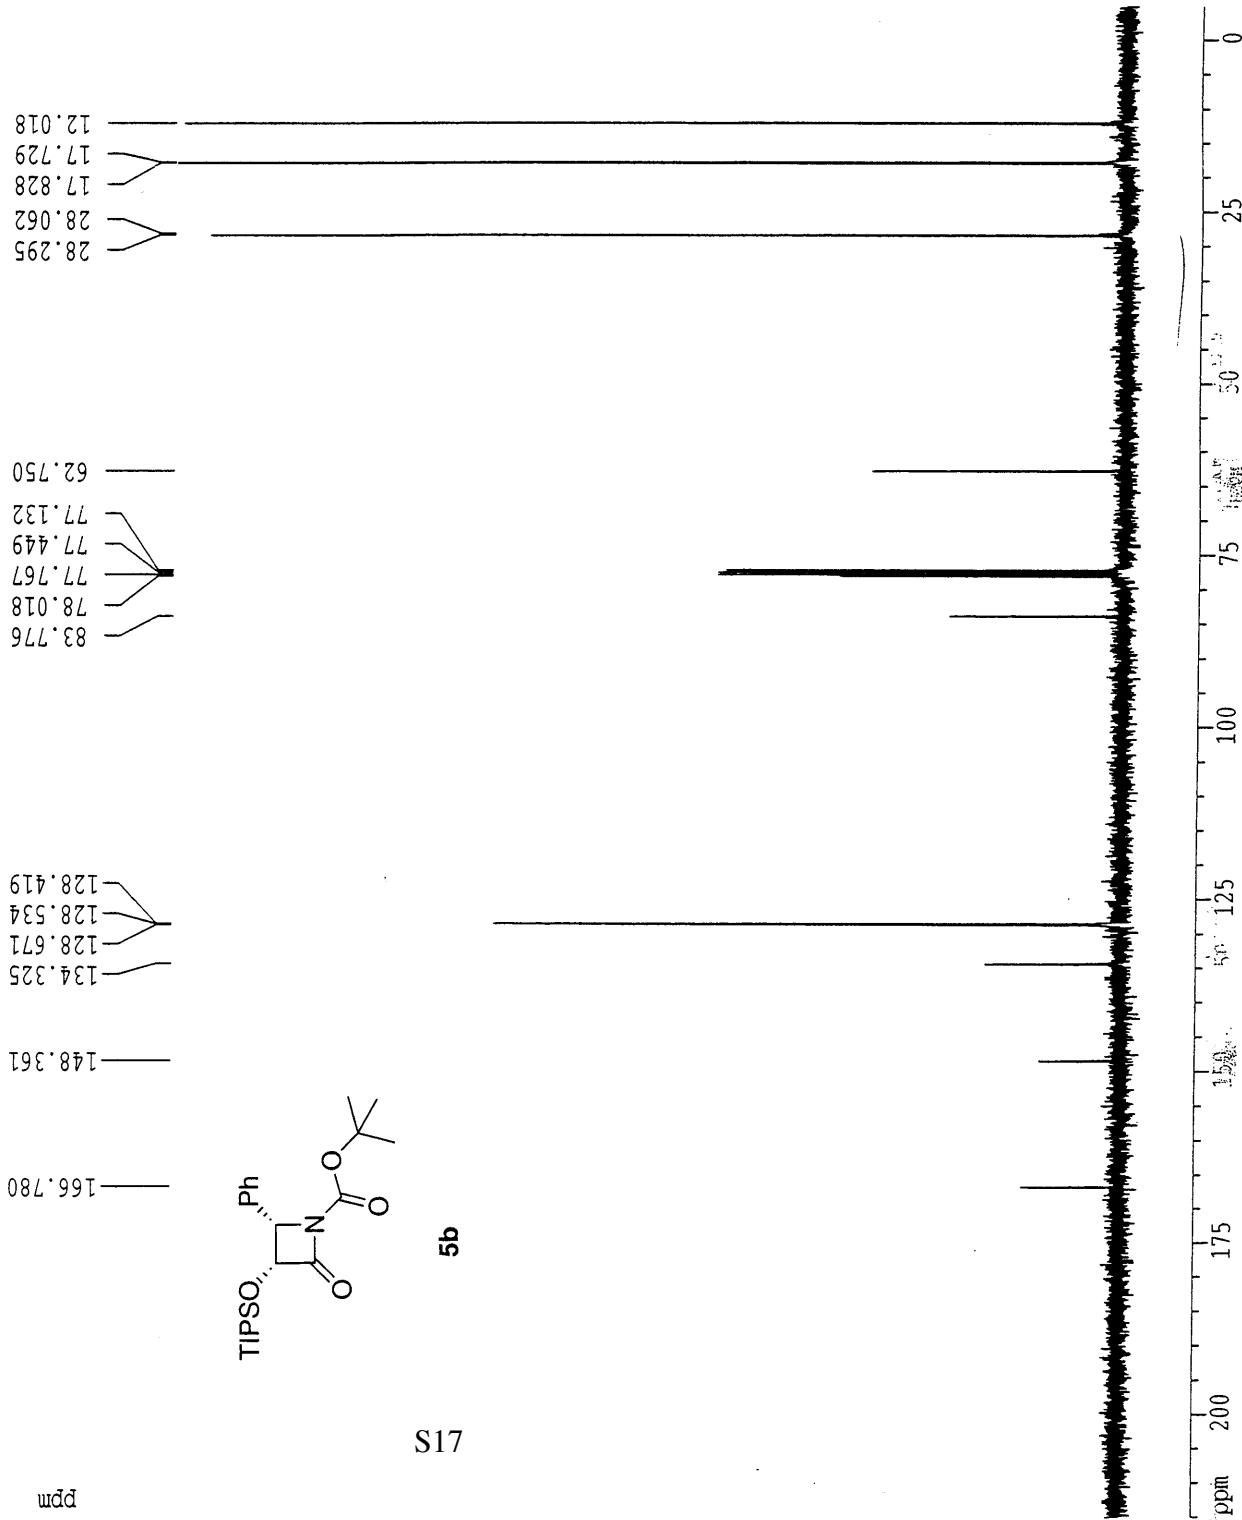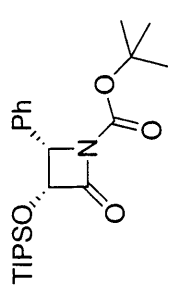

1S

ppm

Current Data Parameters  
 NAME TX-3-135-1-H  
 EXPNO 1  
 PROCNO 1

F2 - Acquisition Parameters  
 Date\_ 20050311  
 Time 11.50  
 INSTRUM drx400  
 PROBH 5 mm QNP 1H/13  
 PULPROG zg30  
 TD 32768  
 SOLVENT CDCl3  
 NS 16  
 DS 2  
 SWH 4789.272 Hz  
 FIDRES 0.146157 Hz  
 AQ 3.4210291 sec  
 RG 64  
 DW 104.400 usec  
 DE 5.50 usec  
 TE 293.2 K  
 D1 1.00000000 sec  
 MCREST 0.00000000 sec  
 MCWRK 0.01500000 sec

===== CHANNEL f1 =====  
 NUC1 1H  
 P1 9.35 usec  
 PL1 -4.00 dB  
 SF01 400.1320007 MHz

F2 - Processing parameters  
 SI 32768  
 SF 400.1300000 MHz  
 WDW EM  
 SSB 0  
 LB 0.30 Hz  
 GB 0  
 PC 1.00

1D NMR plot parameters  
 CX 20.00 cm  
 CY 12.50 cm  
 F1P 11.000 ppm  
 F1 4401.43 Hz  
 F2P -1.000 ppm  
 F2 -400.13 Hz  
 PPMCM 0.60000 ppm/cm  
 HZCM 240.07800 Hz/cm

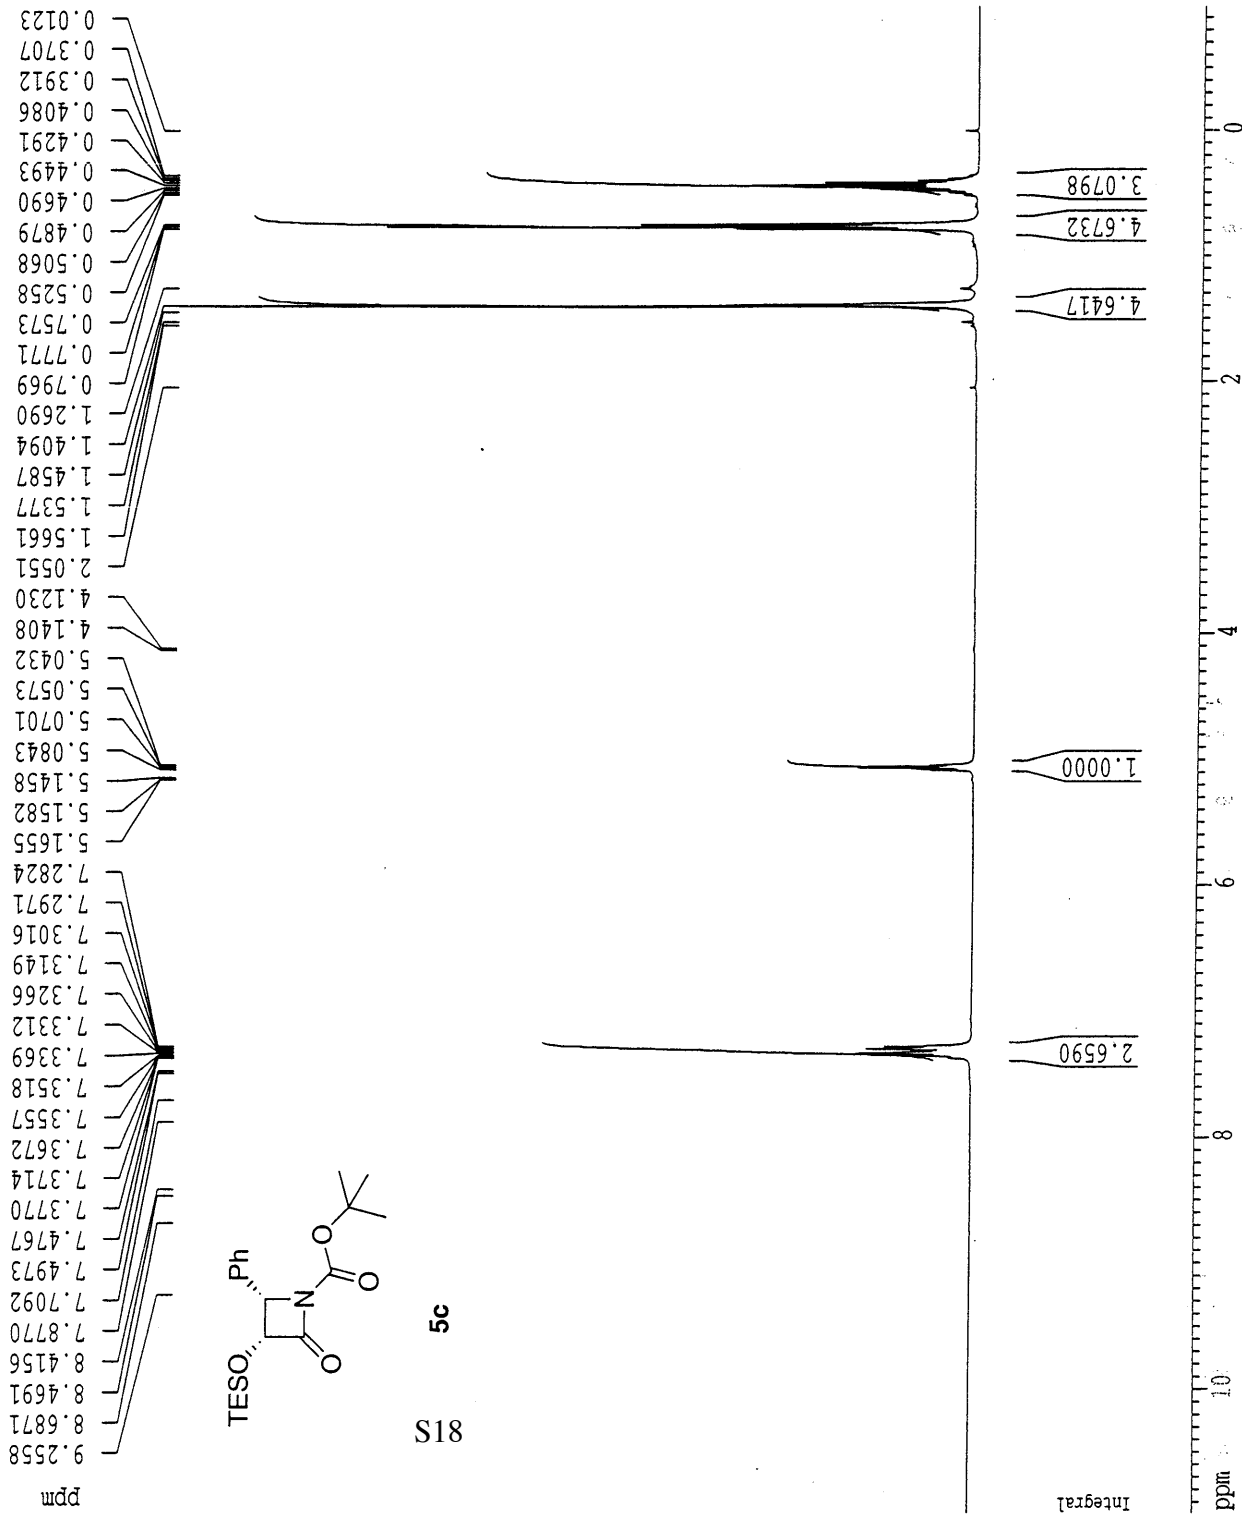

0.0123  
0.3707  
0.3912  
0.4086  
0.4291  
0.4493  
0.4690  
0.4879  
0.5068  
0.5258  
0.5753  
0.7771  
0.7969  
1.2690  
1.4094  
1.4587  
1.5377  
1.5661  
2.0551  
4.1230  
4.1408  
5.0432  
5.0573  
5.0701  
5.0843  
5.1458  
5.1582  
5.1655  
7.2824  
7.2971  
7.3016  
7.3149  
7.3266  
7.3312  
7.3369  
7.3518  
7.3557  
7.3672  
7.3714  
7.3770  
7.4767  
7.4973  
7.7092  
7.8770  
8.4156  
8.4691  
8.6871  
9.2558

81S  
5c

Integral

ppm

Current Data Parameters  
 NAME TX-3-135-1-C  
 EXPNO 1  
 PROCNO 1

F2 - Acquisition Parameters  
 Date\_ 20050311  
 Time 11.52  
 INSTRUM drx400  
 PROBHD 5 mm QNP 1H/13  
 PULPROG zgpg30  
 TD 65536  
 SOLVENT CDCl3  
 NS 206  
 DS 4  
 SWH 23148.148 Hz  
 FIDRES 0.353213 Hz  
 AQ 1.4156276 sec  
 RG 2048  
 DW 21.600 usec  
 DE 5.50 usec  
 TE 293.2 K  
 D1 0.15000001 sec  
 d11 0.03000000 sec  
 DELTA 0.05000000 sec  
 MCREST 0.00000000 sec  
 MCMRX 0.01500000 sec

==== CHANNEL F1 =====  
 NUC1 13C  
 P1 11.25 usec  
 PL1 2.00 dB  
 SFO1 100.6232933 MHz

==== CHANNEL F2 =====  
 CPDPRG2 waltz16  
 NUC2 1H  
 PCPD2 100.00 usec  
 PL2 -4.00 dB  
 PL12 16.58 dB  
 PL13 17.00 dB  
 SFO2 400.1316005 MHz

F2 - Processing parameters  
 SI 65536  
 SF 100.6127290 MHz  
 WDW EM  
 SSB 0  
 LB 1.00 Hz  
 GB 0  
 FC 1.40

1D NMR plot parameters  
 CX 20.00 cm  
 CY 12.50 cm  
 FIP 215.000 ppm  
 F1 21631.74 Hz  
 F2 -5.000 ppm  
 F2 -503.06 Hz  
 PPMCM 11.00000 ppm/cm  
 HZCM 1106.73999 Hz/cm

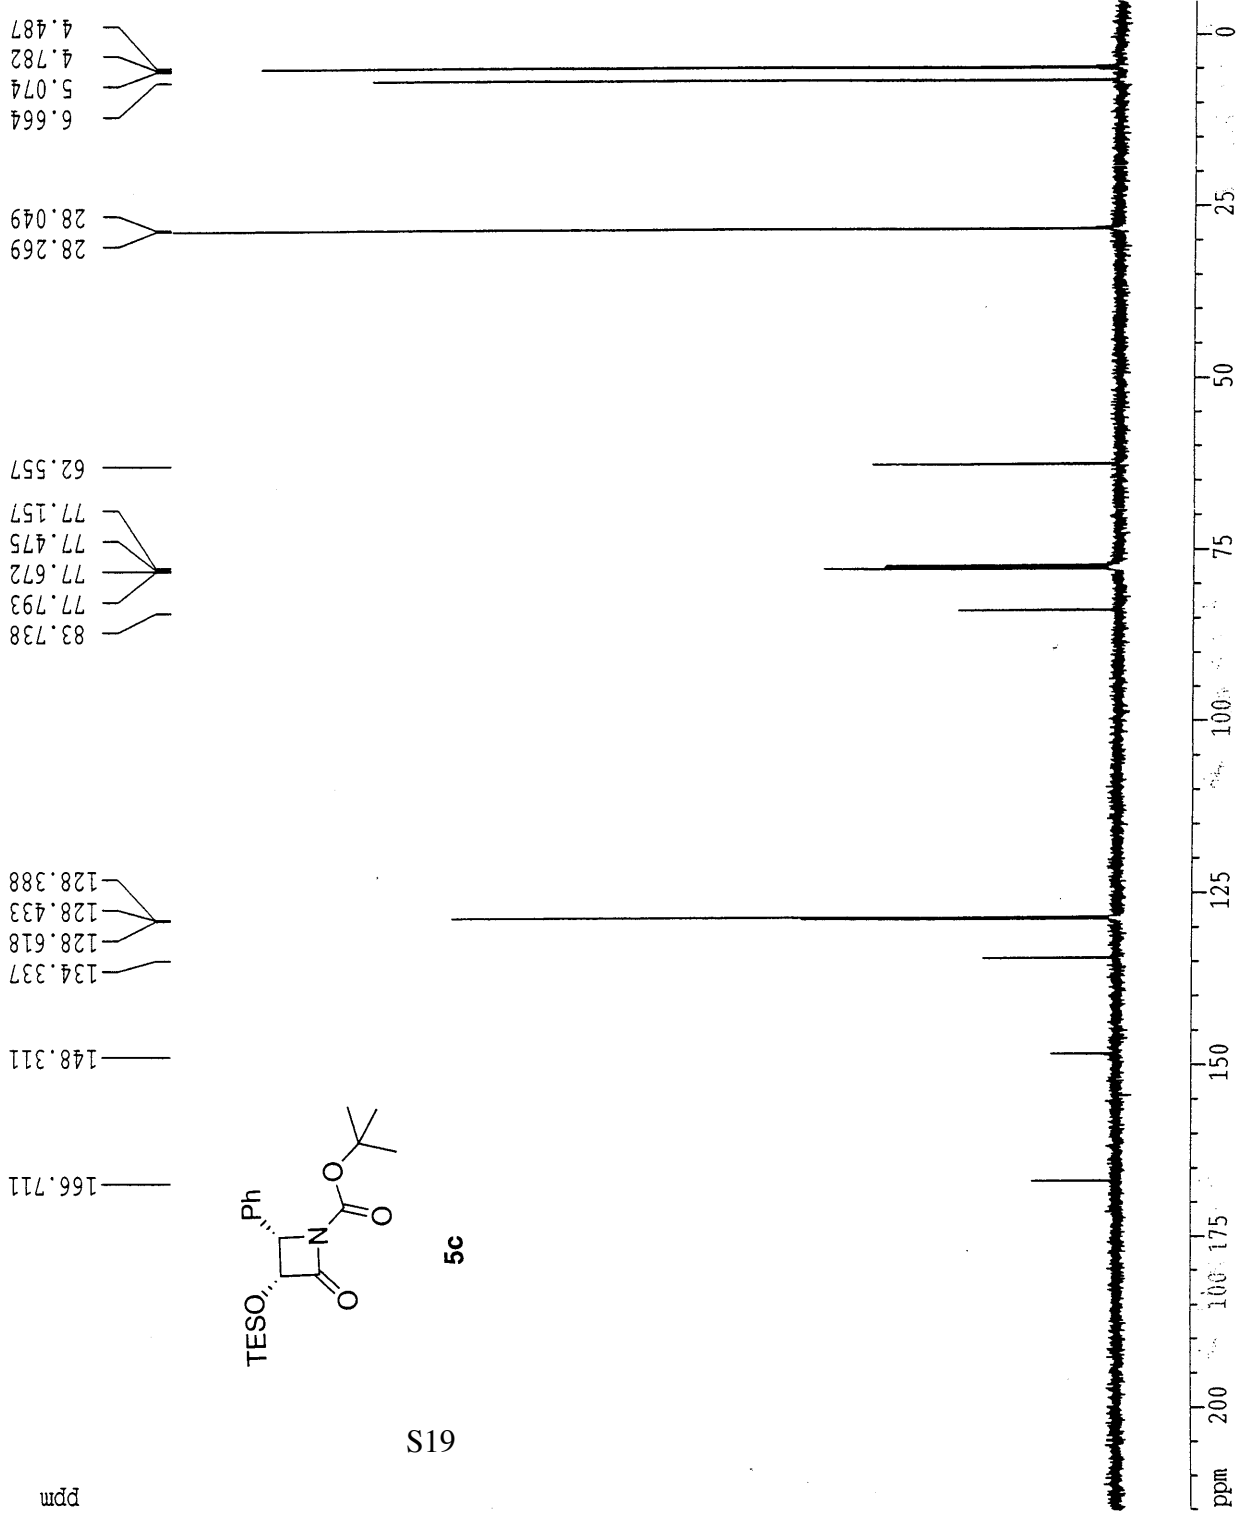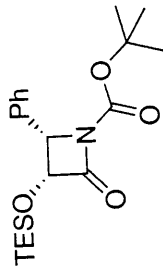

61S

ppm

Current Data Parameters  
 NAME TX-227--H  
 EAPNO 1  
 PROCNO 1

F2 - Acquisition Parameters  
 Date\_ 20040907  
 Time 12.21  
 INSTRUM drx400  
 PROSHD 5 mm Multinuc1  
 PULPROG zg30  
 TD 32768  
 SOLVENT CDCl3  
 NS 16  
 DS 2  
 SWH 4789.272 Hz  
 FIDRES 0.146157 Hz  
 AQ 3.4210291 sec  
 RG 64  
 DW 104.400 usec  
 DE 5.50 usec  
 TE 293.2 K  
 D1 1.00000000 sec  
 MCREST 0.00000000 sec  
 MCWRK 0.01500000 sec

==== CHANNEL f1 =====  
 NUC1 1H  
 P1 7.70 usec  
 PL1 -6.00 dB  
 SFO1 400.1320007 MHz

F2 - Processing parameters  
 SI 32768  
 SF 400.1300000 MHz  
 WDW EM  
 SSB 0  
 LB 0.30 Hz  
 GB 0  
 PC 1.00

1D NMR plot parameters  
 CX 20.00 cm  
 CY 12.50 cm  
 F1P 11.000 ppm  
 F1 4401.43 Hz  
 F2P -1.000 ppm  
 F2 -400.13 Hz  
 PPMCM 0.60000 ppm/cm  
 HZCM 240.07600 Hz/cm

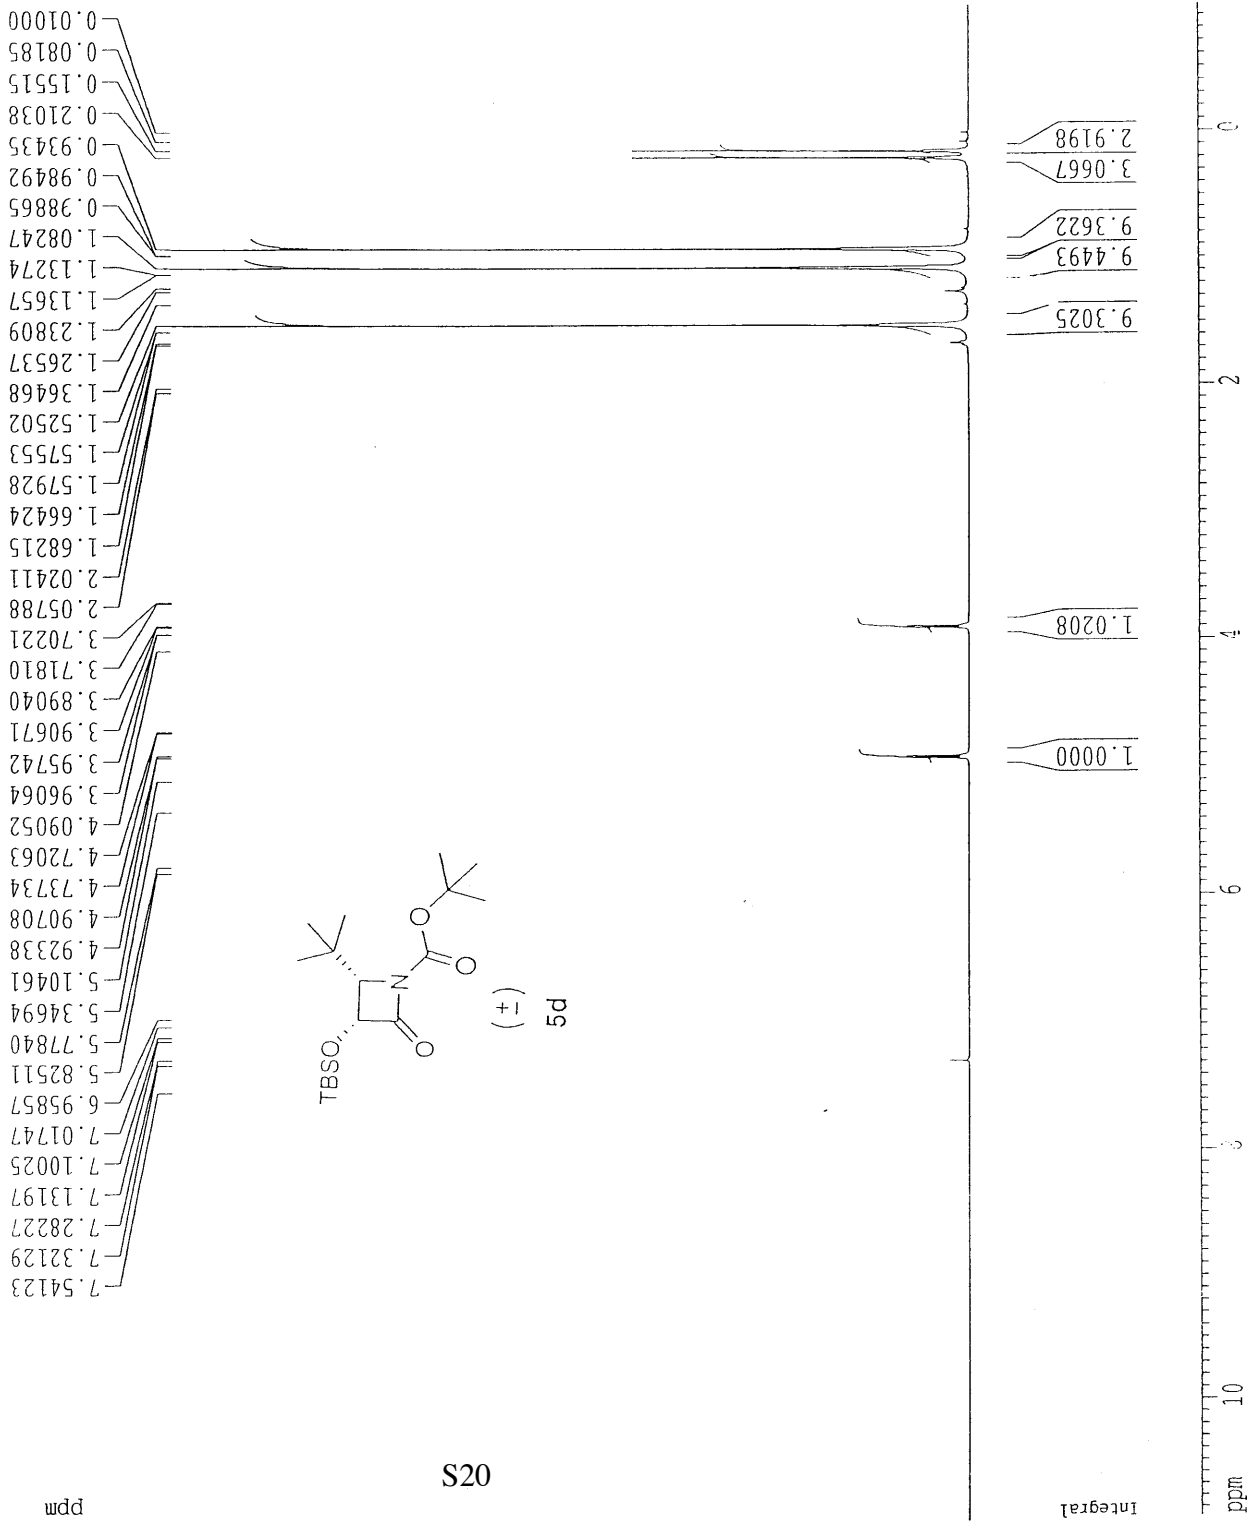



Current Data Parameters  
 NAME TX-227--C  
 EXPNO 1  
 PROCNO 1

F2 - Acquisition Parameters  
 Date\_ 20040907  
 Time 12.25  
 INSTRUM drx400  
 PROBHD 5 mm Multinucl  
 PULPROG zgpg30  
 TD 65536  
 SOLVENT CDC13  
 NS 240  
 DS 4  
 SWH 23148.148 Hz  
 FIDRES 0.353213 Hz  
 AQ 1.4156276 sec  
 RG 2896.3  
 DW 21.600 usec  
 DE 5.50 usec  
 TE 293.2 K  
 D1 0.15000001 sec  
 d11 0.03000000 sec  
 DELTA 0.05000000 sec  
 MCREST 0.00000000 sec  
 MCWRRK 0.01500000 sec

===== CHANNEL f1 =====  
 NUCL1 13C  
 P1 12.30 usec  
 PL1 2.00 dB  
 SF01 100.6232933 MHz

===== CHANNEL f2 =====  
 CPDPRG2 waltz16  
 NUCL2 1H  
 PCPD2 100.00 usec  
 PL2 0.00 dB  
 PL12 18.00 dB  
 PL13 18.00 dB  
 SF02 400.1316005 MHz

F2 - Processing parameters  
 SI 65536  
 SF 100.6127290 MHz  
 WDW EM  
 SSB 0  
 LB 1.00 Hz  
 GB 0  
 PC 1.40

1D NMR plot parameters  
 CX 20.00 cm  
 CY 12.50 cm  
 F1P 38.464 ppm  
 F1 3870.01 Hz  
 F2P -8.817 ppm  
 F2 -887.13 Hz  
 PPMCM 2.36408 ppm/cm  
 HZCM 237.85703 Hz/cm

— 4.3352  
 — 5.0645

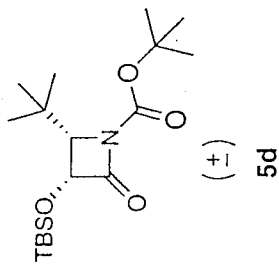

— 18.4232

— 26.0104

— 27.2062

— 28.3872

— 34.7043

ppm

225

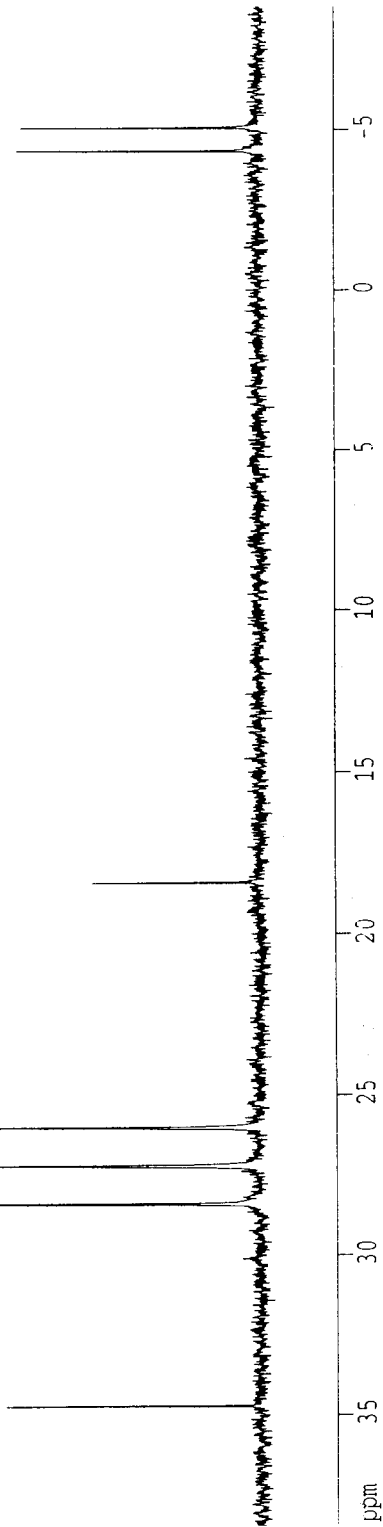

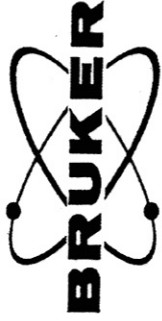

PROTON CDCl3 opt/topspin hge 8

Current Data Parameters  
NAME HB-M-253  
EXPNO 1  
PROCNO 1

F2 - Acquisition Parameters  
Date 20060915  
Time 14.04  
INSTRUM spect  
PROBHD 5 mm CPDUL 13C  
PULPROG zg30  
TD 65536  
SOLVENT CDCl3  
NS 16  
DS 2  
SWH 10330.578 Hz  
FIDRES 0.157632 Hz  
AQ 3.1720407 sec  
RG 12.7  
DW 48.400 usec  
DE 6.00 usec  
TE 298.0 K  
D1 1.00000000 sec  
TDO 1

==== CHANNEL f1 =====  
NUC1 1H  
P1 15.00 usec  
PL1 1.60 dB  
SFO1 500.1330885 MHz

F2 - Processing parameters  
SI 32768  
SF 500.1300138 MHz  
WDW EM  
SSB 0  
LB 0.30 Hz  
GB 0  
PC 1.00

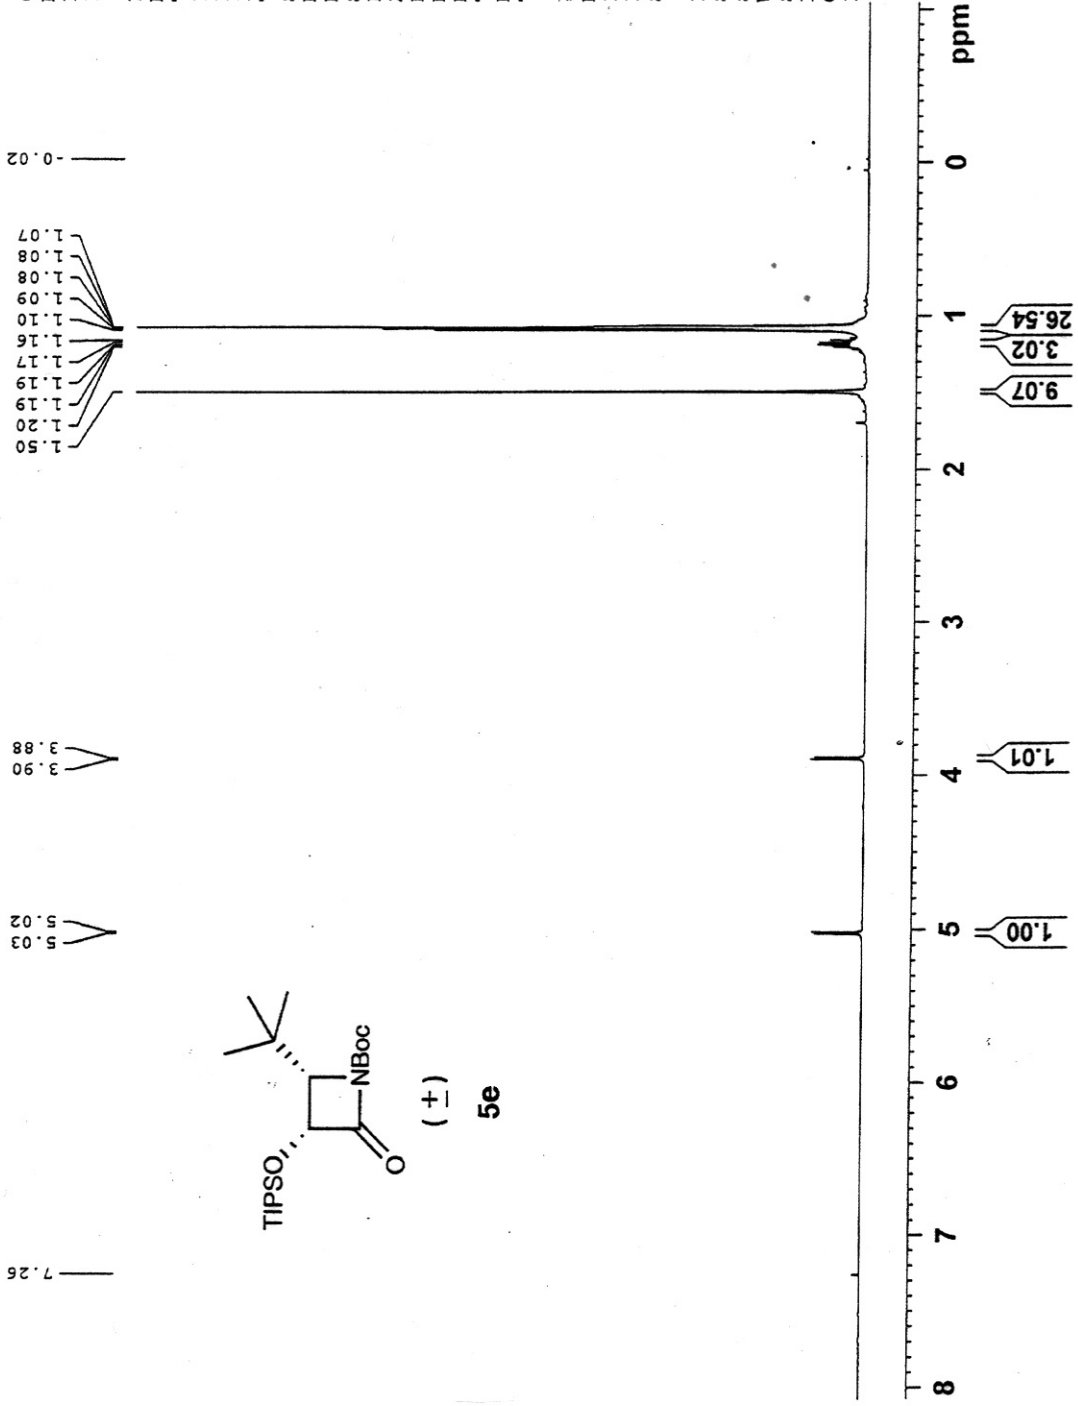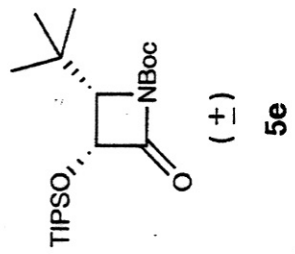

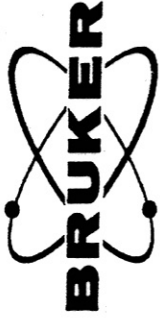

C13CPD CDC13 opt/topspin hge 8

168.22  
149.39

83.21  
77.44  
77.17  
76.91  
76.43  
66.95

34.56  
28.14  
26.99  
18.01  
17.89  
12.13

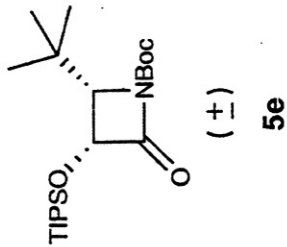

Current Data Parameters  
 NAME HB-M-253  
 EXPNO 2  
 PROCNO 1

F2 - Acquisition Parameters  
 Date\_ 20060915  
 Time 14.08  
 INSTRUM spect  
 PROHD 5 mm CPDUL 13C  
 PULPROG zgpg30  
 TD 65536  
 SOLVENT CDC13  
 NS 256  
 DS 4  
 SWH 30030.029 Hz  
 FIDRES 0.458222 Hz  
 AQ 1.0912410 sec  
 RG 9195.2  
 DW 16.650 usec  
 DE 6.00 usec  
 TE 298.0 K  
 D1 0.15000001 sec  
 d11 0.03000000 sec  
 DELTA 0.05000000 sec  
 TD0 1

==== CHANNEL f1 =====  
 NUC1 13C  
 P1 9.80 usec  
 PL1 3.80 dB  
 SFO1 125.7703643 MHz

==== CHANNEL f2 =====  
 CPDPRG2 waltz16  
 NUC2 1H  
 PCPD2 80.00 usec  
 PL2 1.60 dB  
 PL12 16.14 dB  
 PL13 10.00 dB  
 SFO2 500.1320005 MHz

F2 - Processing parameters  
 SI 32768  
 SF 125.7577759 MHz  
 MWDW EM  
 SSB 0  
 LB 1.00 Hz  
 PC 1.40

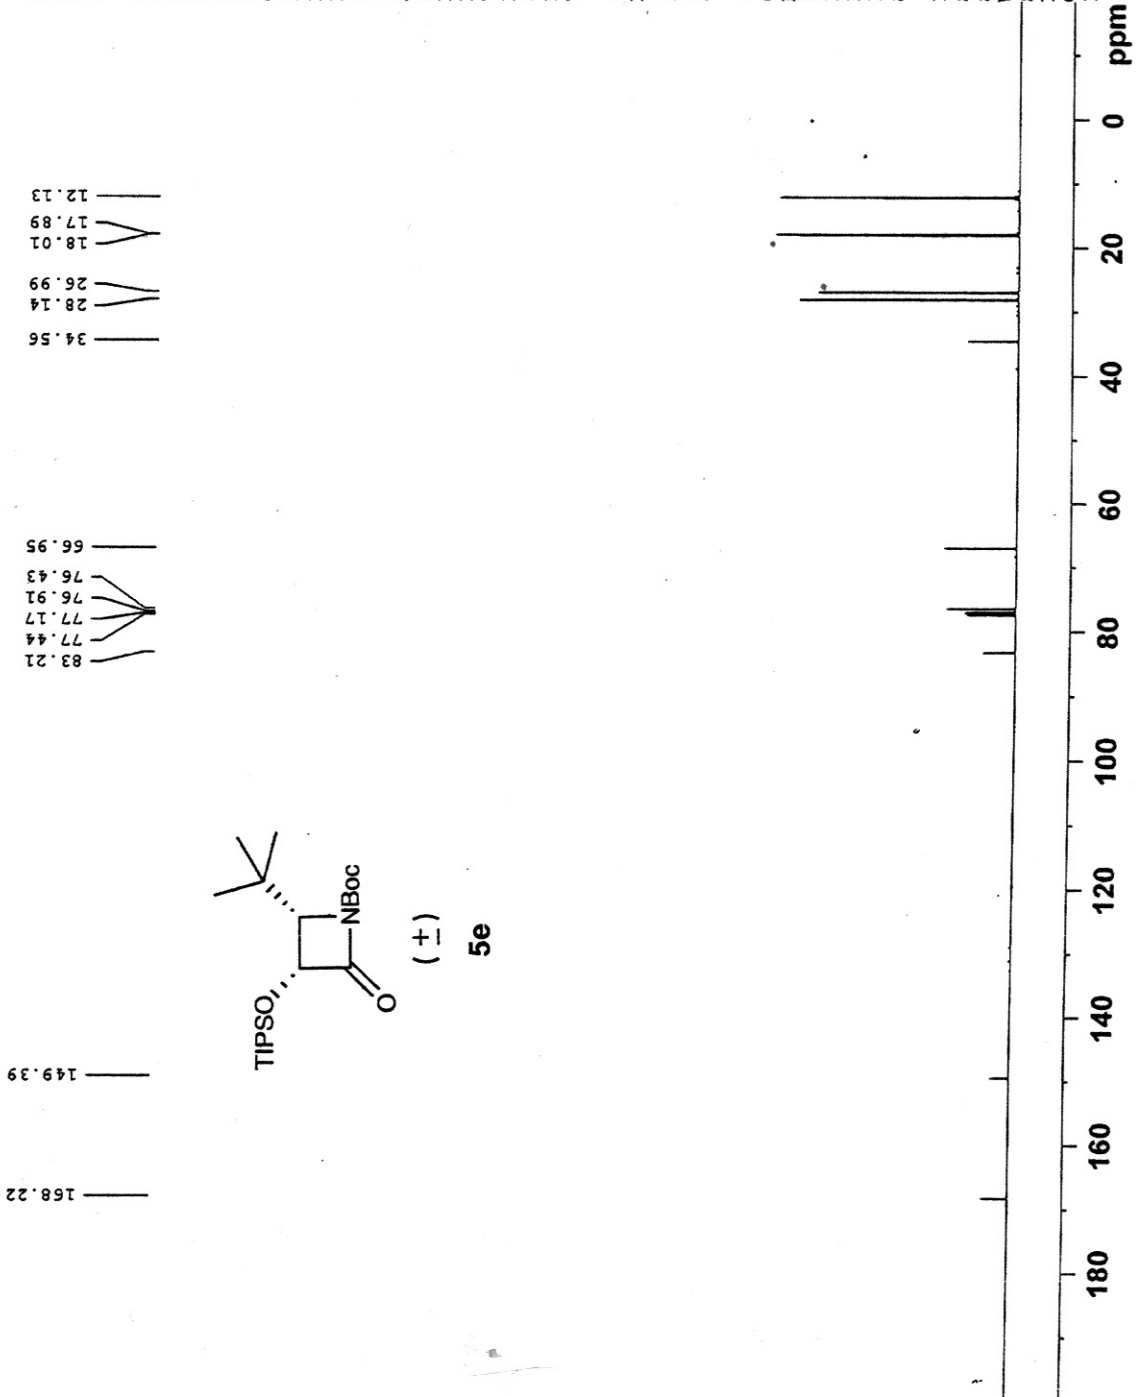



**951 BT-2-59**

|                  |                          |                   |                 |
|------------------|--------------------------|-------------------|-----------------|
| Sample Name:     | <b>BT-2-59</b>           | Injection Volume: | <b>50.0</b>     |
| Vial Number:     | <b>19</b>                | Channel:          | <b>UV_VIS_1</b> |
| Sample Type:     | <b>unknown</b>           | Wavelength:       | <b>240</b>      |
| Control Program: | <b>C4-0-70-2ml-70min</b> | Bandwidth:        | <b>1</b>        |
| Quantif. Method: | <b>BRSL</b>              | Dilution Factor:  | <b>1.0000</b>   |
| Recording Time:  | <b>8/18/05 9:51</b>      | Sample Weight:    | <b>1.0000</b>   |
| Run Time (min):  | <b>75.00</b>             | Sample Amount:    | <b>1.0000</b>   |

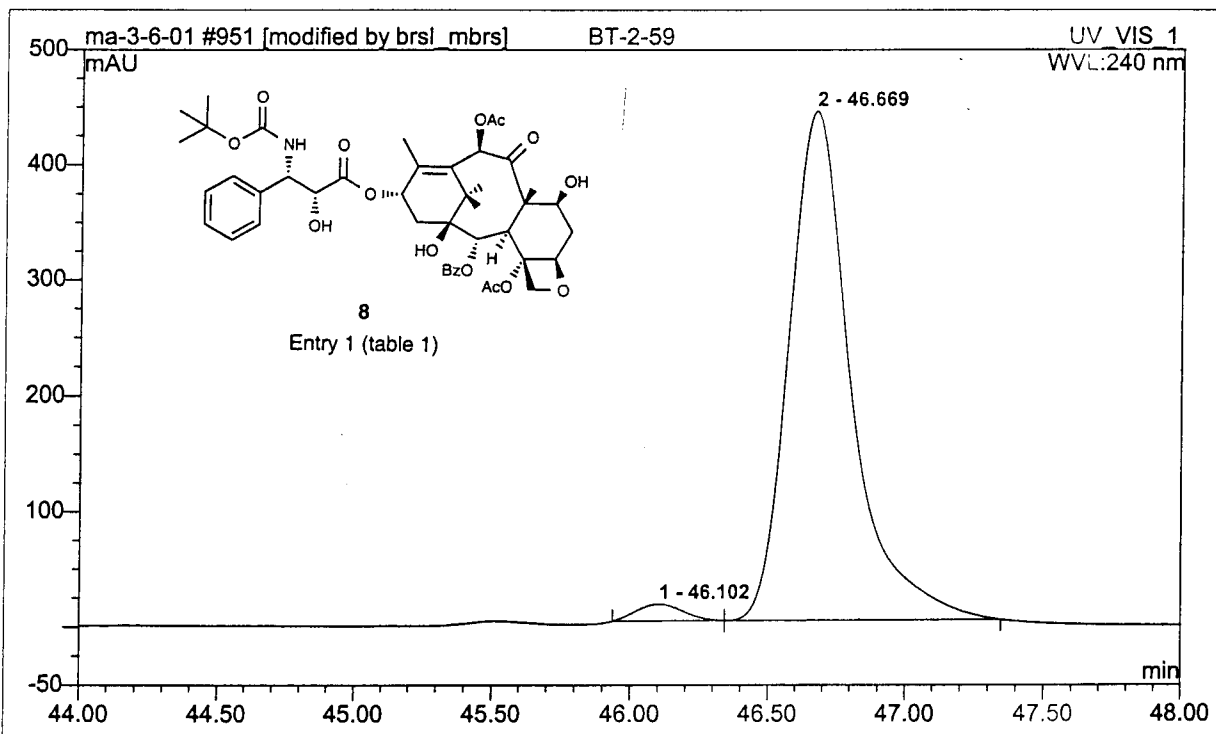

| No.           | Ret.Time<br>min | Peak Name | Height<br>mAU | Area<br>mAU*min | Rel.Area<br>% | Amount | Type |
|---------------|-----------------|-----------|---------------|-----------------|---------------|--------|------|
| 1             | 46.10           | n.a.      | 14.299        | 2.809           | 2.37          | n.a.   | BM * |
| 2             | 46.67           | n.a.      | 440.408       | 115.523         | 97.63         | n.a.   | MB*  |
| <b>Total:</b> |                 |           | 454.707       | 118.333         | 100.00        | 0.000  |      |

**953 HB-3-203**

|                         |                          |                          |                 |
|-------------------------|--------------------------|--------------------------|-----------------|
| <b>Sample Name:</b>     | <b>HB-3-203</b>          | <b>Injection Volume:</b> | <b>50.0</b>     |
| <b>Vial Number:</b>     | <b>21</b>                | <b>Channel:</b>          | <b>UV_VIS_1</b> |
| <b>Sample Type:</b>     | <b>unknown</b>           | <b>Wavelength:</b>       | <b>240</b>      |
| <b>Control Program:</b> | <b>C4-0-70-2ml-70min</b> | <b>Bandwidth:</b>        | <b>1</b>        |
| <b>Quantif. Method:</b> | <b>BRSL</b>              | <b>Dilution Factor:</b>  | <b>1.0000</b>   |
| <b>Recording Time:</b>  | <b>8/18/05 12:45</b>     | <b>Sample Weight:</b>    | <b>1.0000</b>   |
| <b>Run Time (min):</b>  | <b>75.00</b>             | <b>Sample Amount:</b>    | <b>1.0000</b>   |

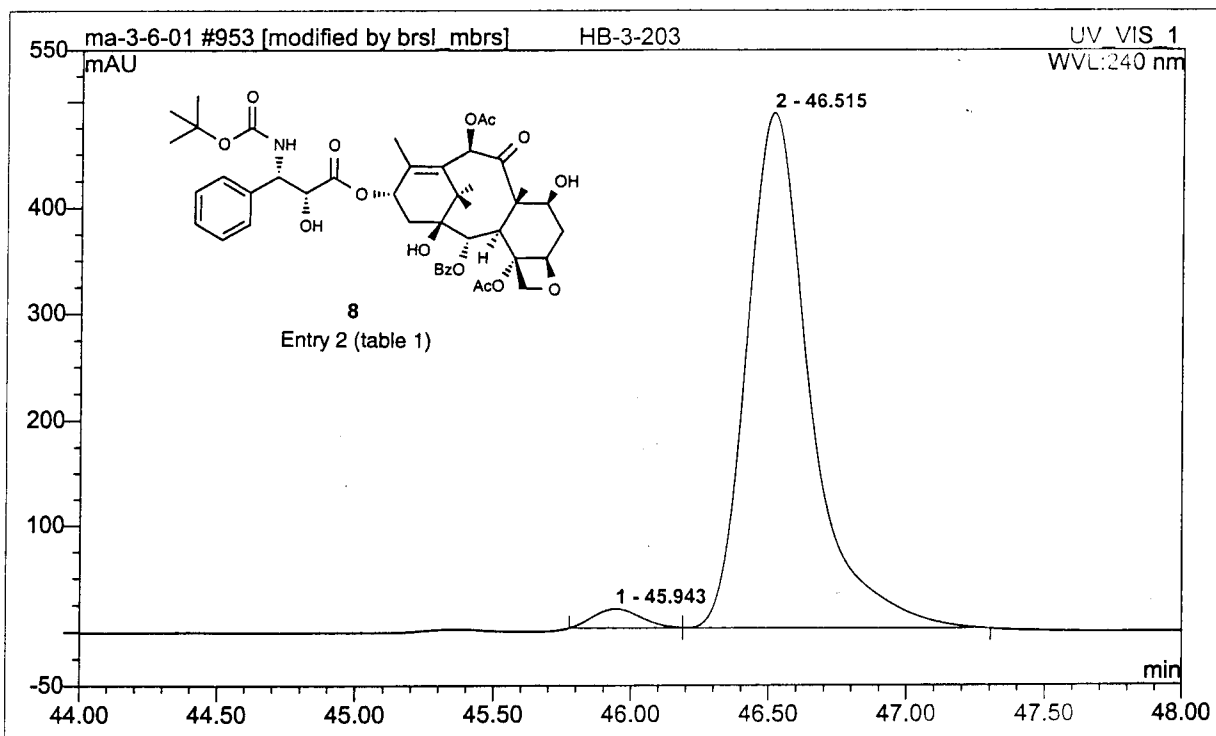

| No.           | Ret.Time<br>min | Peak Name | Height<br>mAU | Area<br>mAU*min | Rel.Area<br>% | Amount | Type |
|---------------|-----------------|-----------|---------------|-----------------|---------------|--------|------|
| 1             | 45.94           | n.a.      | 17.747        | 3.580           | 2.70          | n.a.   | BM * |
| 2             | 46.51           | n.a.      | 485.942       | 128.877         | 97.30         | n.a.   | MB*  |
| <b>Total:</b> |                 |           | 503.690       | 132.457         | 100.00        | 0.000  |      |

|                     |                   |                   |          |
|---------------------|-------------------|-------------------|----------|
| <b>952 HB-3-205</b> |                   |                   |          |
| Sample Name:        | HB-3-205          | Injection Volume: | 50.0     |
| Vial Number:        | 20                | Channel:          | UV_VIS_1 |
| Sample Type:        | unknown           | Wavelength:       | 240      |
| Control Program:    | C4-0-70-2ml-70min | Bandwidth:        | 1        |
| Quantif. Method:    | BRSL              | Dilution Factor:  | 1.0000   |
| Recording Time:     | 8/18/05 11:18     | Sample Weight:    | 1.0000   |
| Run Time (min):     | 75.00             | Sample Amount:    | 1.0000   |

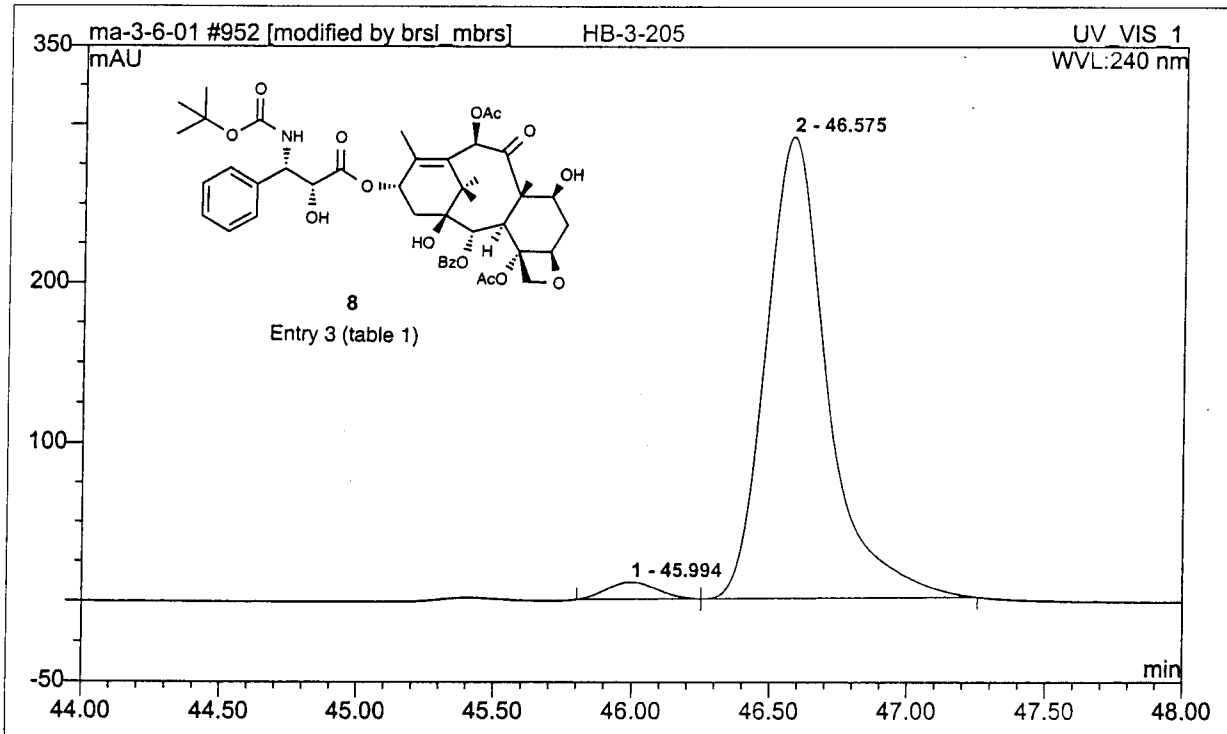

| No.           | Ret.Time<br>min | Peak Name | Height<br>mAU | Area<br>mAU*min | Rel.Area<br>% | Amount | Type |
|---------------|-----------------|-----------|---------------|-----------------|---------------|--------|------|
| 1             | 45.99           | n.a.      | 10.672        | 2.239           | 2.89          | n.a.   | BM * |
| 2             | 46.57           | n.a.      | 290.418       | 75.205          | 97.11         | n.a.   | MB*  |
| <b>Total:</b> |                 |           | 301.090       | 77.444          | 100.00        | 0.000  |      |

**955 HB-3-211**

|                         |                          |                          |          |
|-------------------------|--------------------------|--------------------------|----------|
| <b>Sample Name:</b>     | <b>HB-3-211</b>          | <b>Injection Volume:</b> | 50.0     |
| <b>Vial Number:</b>     | <b>23</b>                | <b>Channel:</b>          | UV_VIS_1 |
| <b>Sample Type:</b>     | <b>unknown</b>           | <b>Wavelength:</b>       | 240      |
| <b>Control Program:</b> | <b>C4-0-70-2ml-70min</b> | <b>Bandwidth:</b>        | 1        |
| <b>Quantif. Method:</b> | <b>BRSL</b>              | <b>Dilution Factor:</b>  | 1.0000   |
| <b>Recording Time:</b>  | <b>8/18/05 15:38</b>     | <b>Sample Weight:</b>    | 1.0000   |
| <b>Run Time (min):</b>  | <b>75.00</b>             | <b>Sample Amount:</b>    | 1.0000   |

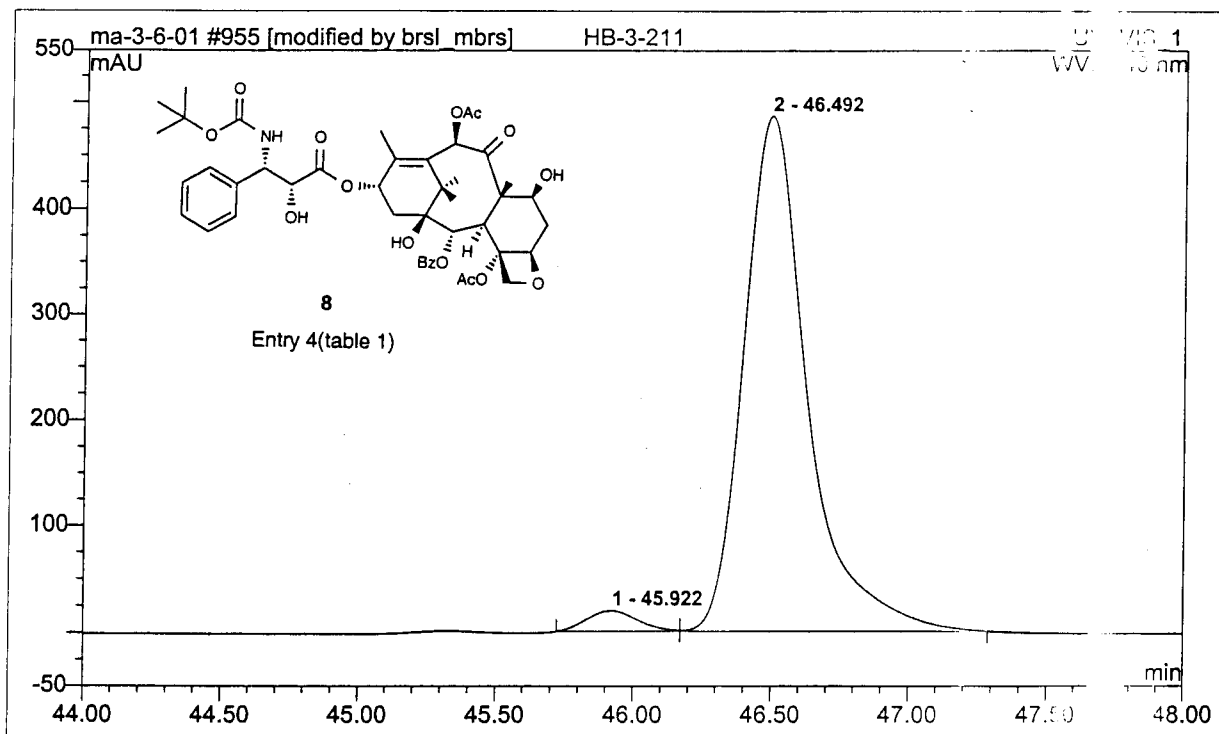

| No.           | Ret.Time<br>min | Peak Name | Height<br>mAU | Area<br>mAU*min | Rel.Area<br>% | Amount | Type |
|---------------|-----------------|-----------|---------------|-----------------|---------------|--------|------|
| 1             | 45.92           | n.a.      | 18.899        | 4.072           | 3.05          | n.a.   | BM * |
| 2             | 46.49           | n.a.      | 485.331       | 129.473         | 96.95         | n.a.   | MB*  |
| <b>Total:</b> |                 |           | 504.230       | 133.545         | 100.00        | 0.000  |      |

|                     |                   |                   |          |
|---------------------|-------------------|-------------------|----------|
| <b>946 HB-3-201</b> |                   |                   |          |
| Sample Name:        | HB-3-201          | Injection Volume: | 50.0     |
| Vial Number:        | 17                | Channel:          | UV_VIS_1 |
| Sample Type:        | unknown           | Wavelength:       | 240      |
| Control Program:    | C4-0-70-2ml-70min | Bandwidth:        | 1        |
| Quantif. Method:    | BRSL              | Dilution Factor:  | 1.0000   |
| Recording Time:     | 8/17/05 12:52     | Sample Weight:    | 1.0000   |
| Run Time (min):     | 75.00             | Sample Amount:    | 1.0000   |

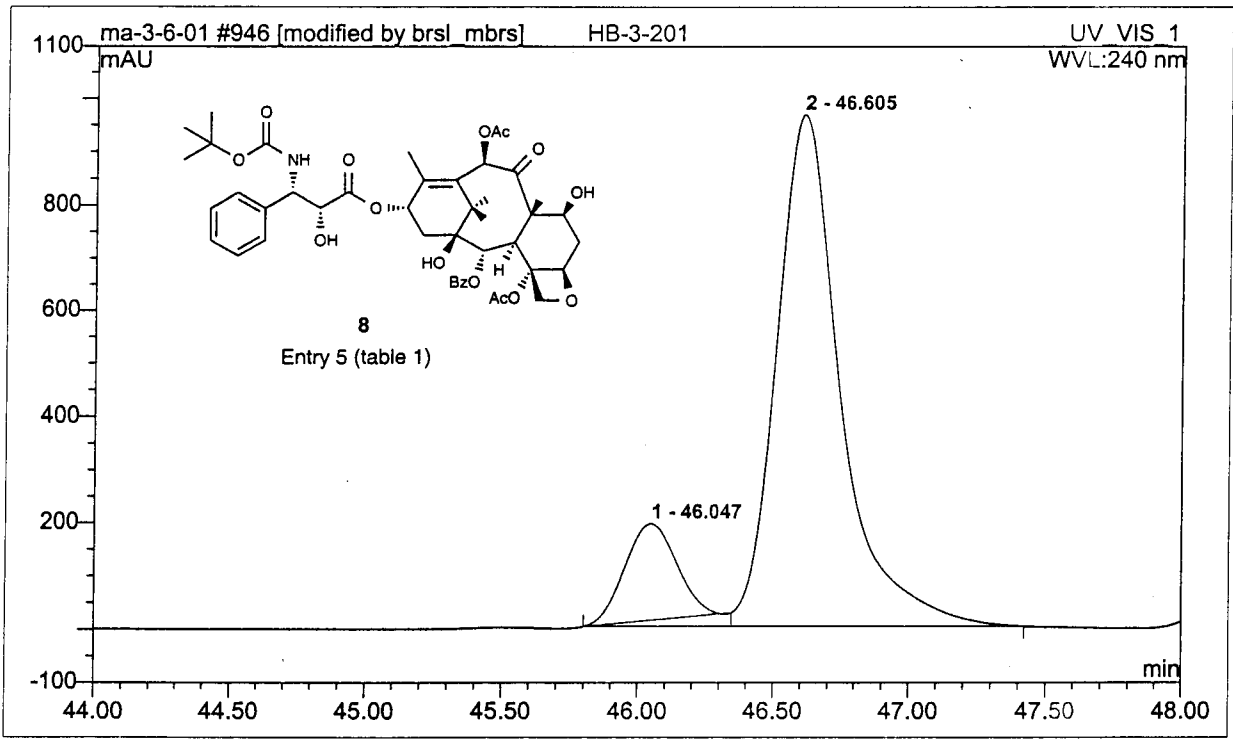

| No.           | Ret.Time<br>min | Peak Name | Height<br>mAU | Area<br>mAU*min | Rel.Area<br>% | Amount | Type |
|---------------|-----------------|-----------|---------------|-----------------|---------------|--------|------|
| 1             | 46.05           | n.a.      | 181.113       | 39.877          | 12.87         | n.a.   | Ru*  |
| 2             | 46.61           | n.a.      | 963.720       | 269.861         | 87.13         | n.a.   | BMB* |
| <b>Total:</b> |                 |           | 1144.833      | 309.738         | 100.00        | 0.000  |      |

**956 HB-3-215**

|                  |                   |                   |          |
|------------------|-------------------|-------------------|----------|
| Sample Name:     | HB-3-215          | Injection Volume: | 50.0     |
| Vial Number:     | 24                | Channel:          | UV_VIS_1 |
| Sample Type:     | unknown           | Wavelength:       | 240      |
| Control Program: | C4-0-70-2ml-70min | Bandwidth:        | 1        |
| Quantif. Method: | BRSL              | Dilution Factor:  | 1.0000   |
| Recording Time:  | 8/18/05 17:05     | Sample Weight:    | 1.0000   |
| Run Time (min):  | 75.00             | Sample Amount:    | 1.0000   |

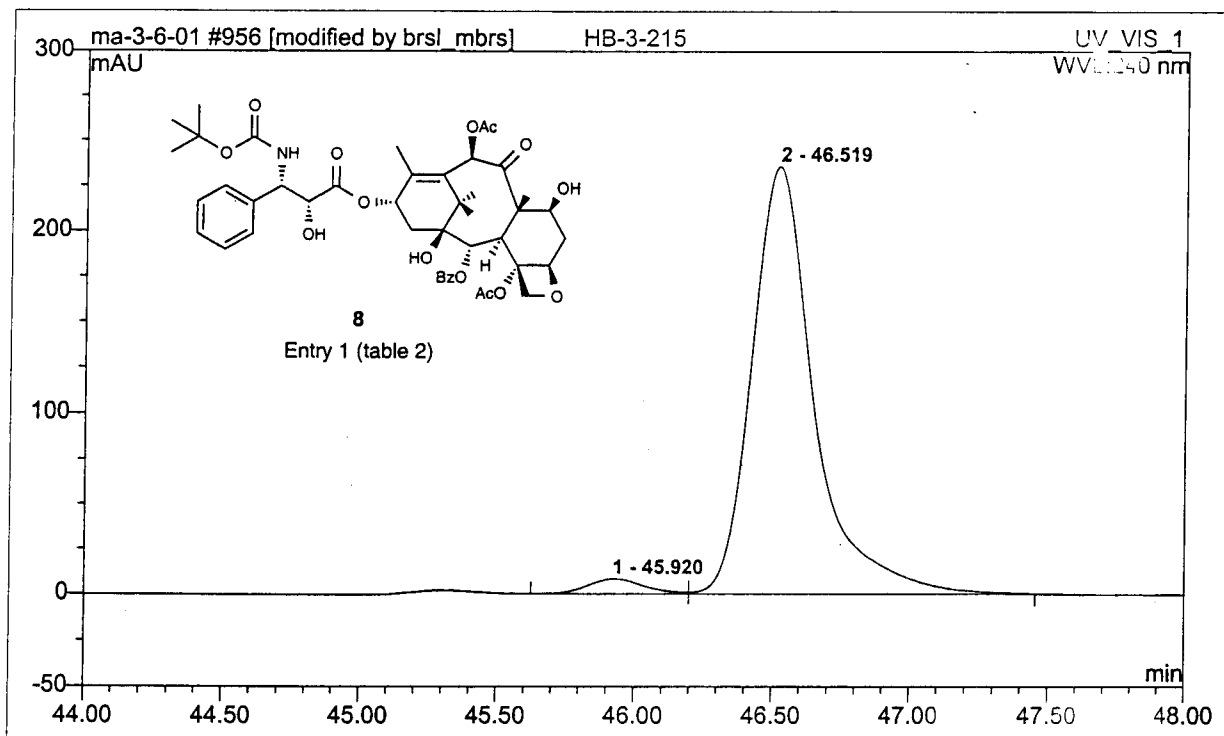

| No.           | Ret.Time<br>min | Peak Name | Height<br>mAU | Area<br>mAU*min | Rel.Area<br>% | Amount | Type |
|---------------|-----------------|-----------|---------------|-----------------|---------------|--------|------|
| 1             | 45.92           | n.a.      | 8.188         | 1.947           | 3.04          | n.a.   | EM   |
| 2             | 46.52           | n.a.      | 235.508       | 62.031          | 96.96         | n.a.   | MB   |
| <b>Total:</b> |                 |           | 243.697       | 63.978          | 100.00        | 0.000  |      |

|                     |                   |                   |          |
|---------------------|-------------------|-------------------|----------|
| <b>954 HB-3-213</b> |                   |                   |          |
| Sample Name:        | HB-3-213          | Injection Volume: | 50.0     |
| Vial Number:        | 22                | Channel:          | UV_VIS_1 |
| Sample Type:        | unknown           | Wavelength:       | 240      |
| Control Program:    | C4-0-70-2ml-70min | Bandwidth:        | 1        |
| Quantif. Method:    | BRSL              | Dilution Factor:  | 1.0000   |
| Recording Time:     | 8/18/05 14:11     | Sample Weight:    | 1.0000   |
| Run Time (min):     | 75.00             | Sample Amount:    | 1.0000   |

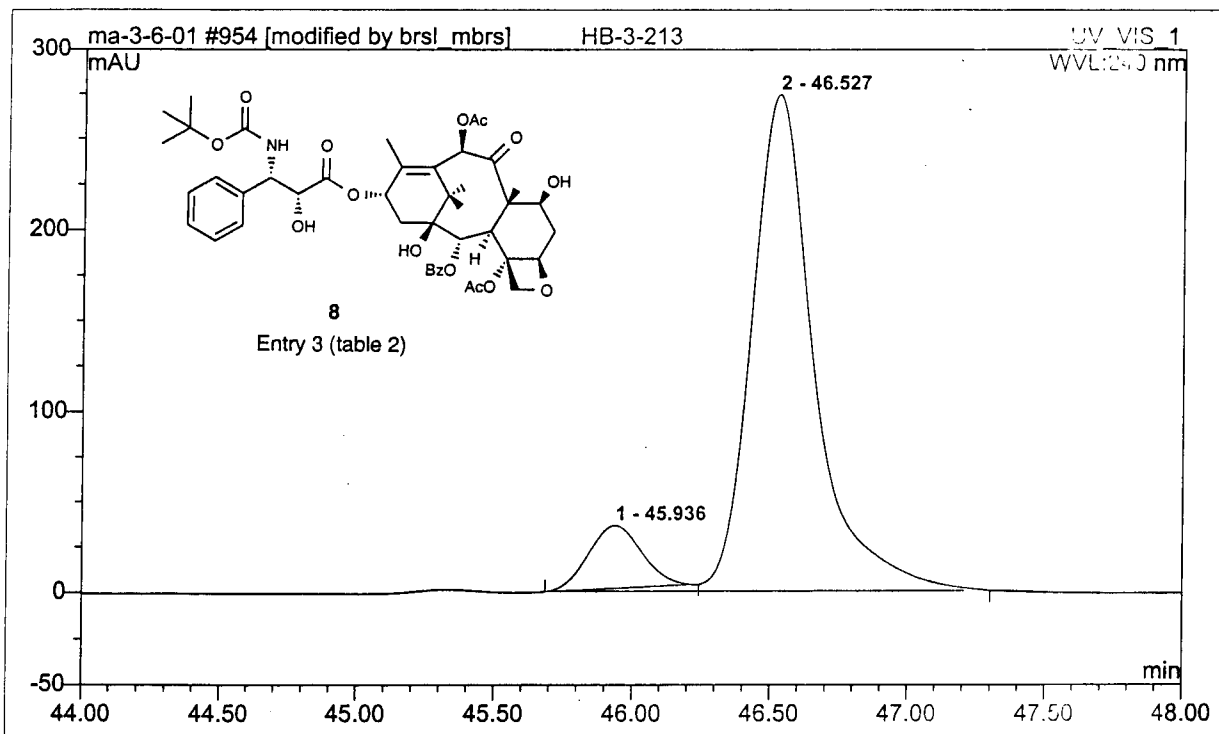

| No.           | Ret.Time<br>min | Peak Name | Height<br>mAU | Area<br>mAU*min | Rel.Area<br>% | Amount | Type |
|---------------|-----------------|-----------|---------------|-----------------|---------------|--------|------|
| 1             | 45.94           | n.a.      | 34.471        | 7.671           | 9.51          | n.a.   | Ru*  |
| 2             | 46.53           | n.a.      | 273.703       | 72.961          | 90.49         | n.a.   | BMB* |
| <b>Total:</b> |                 |           | 308.174       | 80.632          | 100.00        | 0.000  |      |

|                    |                      |                   |          |
|--------------------|----------------------|-------------------|----------|
| <b>88 HB-M-259</b> |                      |                   |          |
| Sample Name:       | HB-M-259             | Injection Volume: | 50.0     |
| Vial Number:       | 19                   | Channel:          | UV_VIS_1 |
| Sample Type:       | unknown              | Wavelength:       | 240      |
| Control Program:   | Gradan2ml100%-100min | Bandwidth:        | 1        |
| Quantif. Method:   | Default              | Dilution Factor:  | 1.0000   |
| Recording Time:    | 10/4/2006 10:56      | Sample Weight:    | 1.0000   |
| Run Time (min):    | 100.00               | Sample Amount:    | 1.0000   |

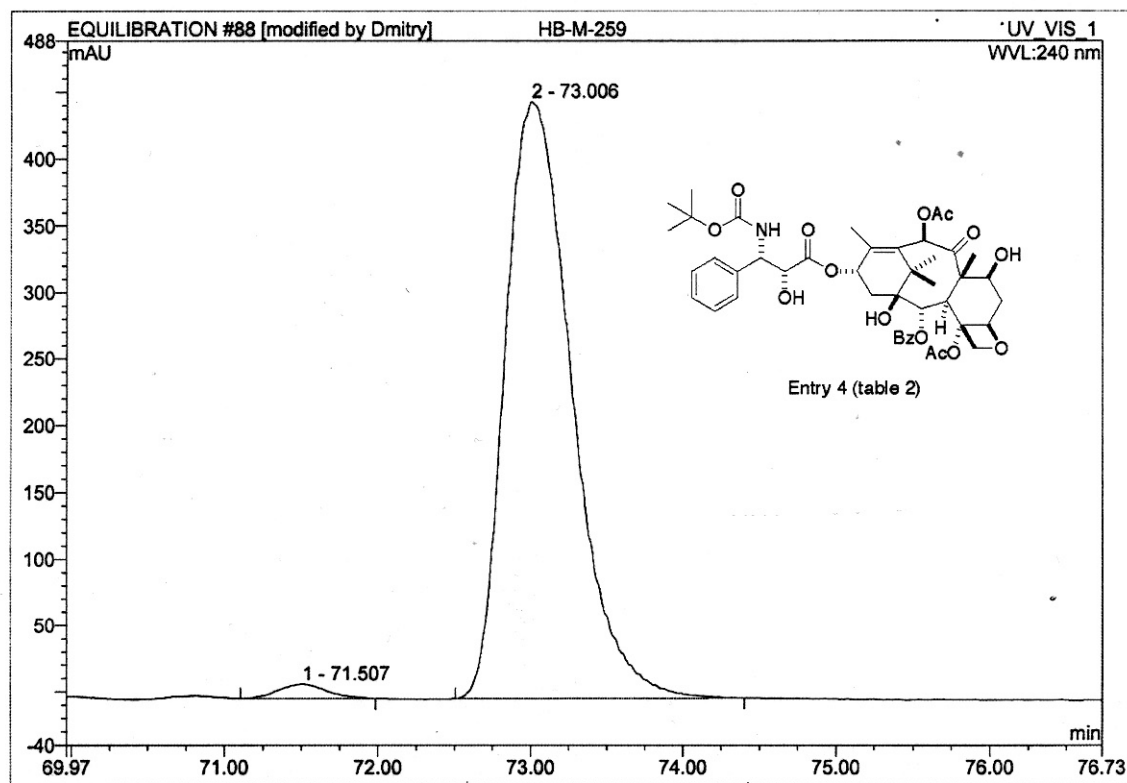

| No.           | Ret.Time<br>min | Peak Name | Height<br>mAU | Area<br>mAU*min | Rel.Area<br>% | Amount<br>n.a. | Type |
|---------------|-----------------|-----------|---------------|-----------------|---------------|----------------|------|
| 1             | 71.51           | n.a.      | 10.844        | 3.981           | 1.72          | n.a.           | BMB* |
| 2             | 73.01           | n.a.      | 447.699       | 227.331         | 98.28         | n.a.           | BMB* |
| <b>Total:</b> |                 |           | 458.542       | 231.312         | 100.00        | 0.000          |      |



|                    |                             |                   |                 |
|--------------------|-----------------------------|-------------------|-----------------|
| <b>89 HB-3-207</b> |                             |                   |                 |
| Sample Name:       | <b>HB-3-207</b>             | Injection Volume: | <b>50.0</b>     |
| Vial Number:       | <b>22</b>                   | Channel:          | <b>UV_VIS_1</b> |
| Sample Type:       | <b>unknown</b>              | Wavelength:       | <b>240</b>      |
| Control Program:   | <b>Gradan2ml100%-100min</b> | Bandwidth:        | <b>1</b>        |
| Quantif. Method:   | <b>Default</b>              | Dilution Factor:  | <b>1.0000</b>   |
| Recording Time:    | <b>10/4/2006 12:47</b>      | Sample Weight:    | <b>1.0000</b>   |
| Run Time (min):    | <b>100.00</b>               | Sample Amount:    | <b>1.0000</b>   |

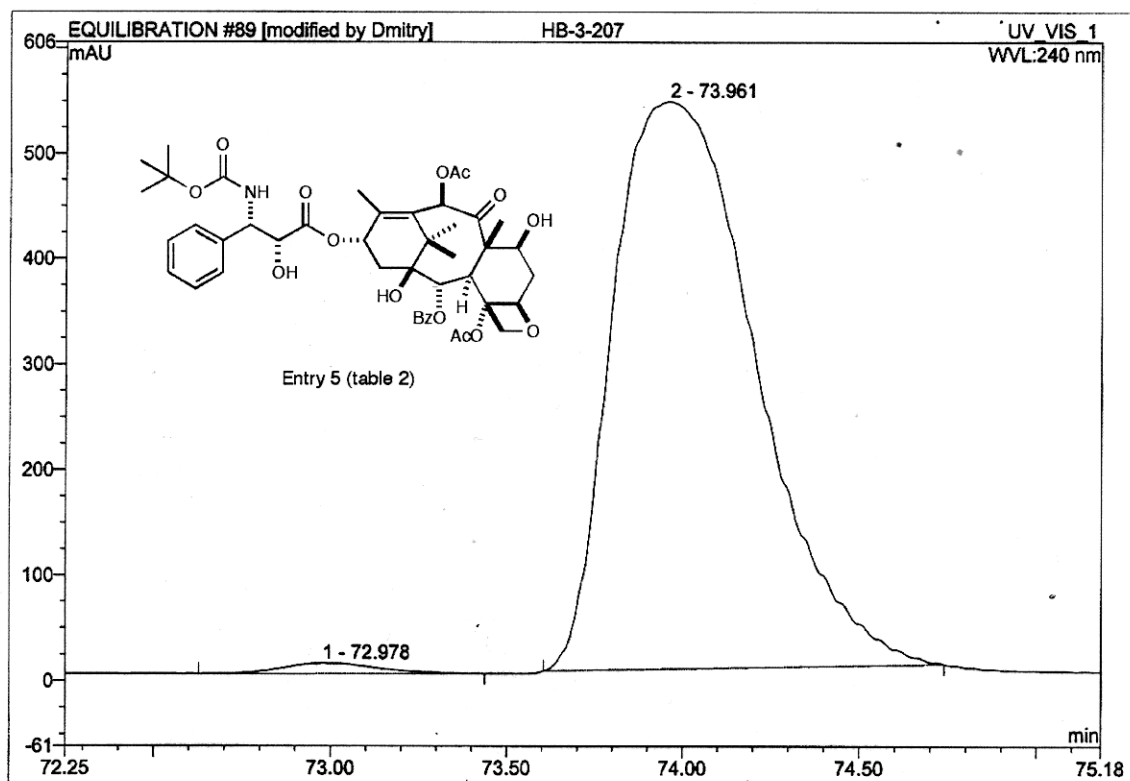

| No.           | Ret.Time min | Peak Name | Height mAU     | Area mAU*min   | Rel.Area %    | Amount n.a.  | Type |
|---------------|--------------|-----------|----------------|----------------|---------------|--------------|------|
| 1             | 72.98        | n.a.      | 9.921          | 3.079          | 1.21          | n.a.         | BMB* |
| 2             | 73.96        | n.a.      | 537.766        | 252.251        | 98.79         | n.a.         | BMB* |
| <b>Total:</b> |              |           | <b>547.687</b> | <b>255.330</b> | <b>100.00</b> | <b>0.000</b> |      |

|                         |                             |                          |                 |
|-------------------------|-----------------------------|--------------------------|-----------------|
| <b>85 HB-3-209</b>      |                             |                          |                 |
| <b>Sample Name:</b>     | <b>HB-3-209</b>             | <b>Injection Volume:</b> | <b>50.0</b>     |
| <b>Vial Number:</b>     | <b>17</b>                   | <b>Channel:</b>          | <b>UV_VIS_1</b> |
| <b>Sample Type:</b>     | <b>unknown</b>              | <b>Wavelength:</b>       | <b>240</b>      |
| <b>Control Program:</b> | <b>Gradan2ml100%-100min</b> | <b>Bandwidth:</b>        | <b>1</b>        |
| <b>Quantif. Method:</b> | <b>Default</b>              | <b>Dilution Factor:</b>  | <b>1.0000</b>   |
| <b>Recording Time:</b>  | <b>10/3/2006 19:05</b>      | <b>Sample Weight:</b>    | <b>1.0000</b>   |
| <b>Run Time (min):</b>  | <b>100.00</b>               | <b>Sample Amount:</b>    | <b>1.0000</b>   |

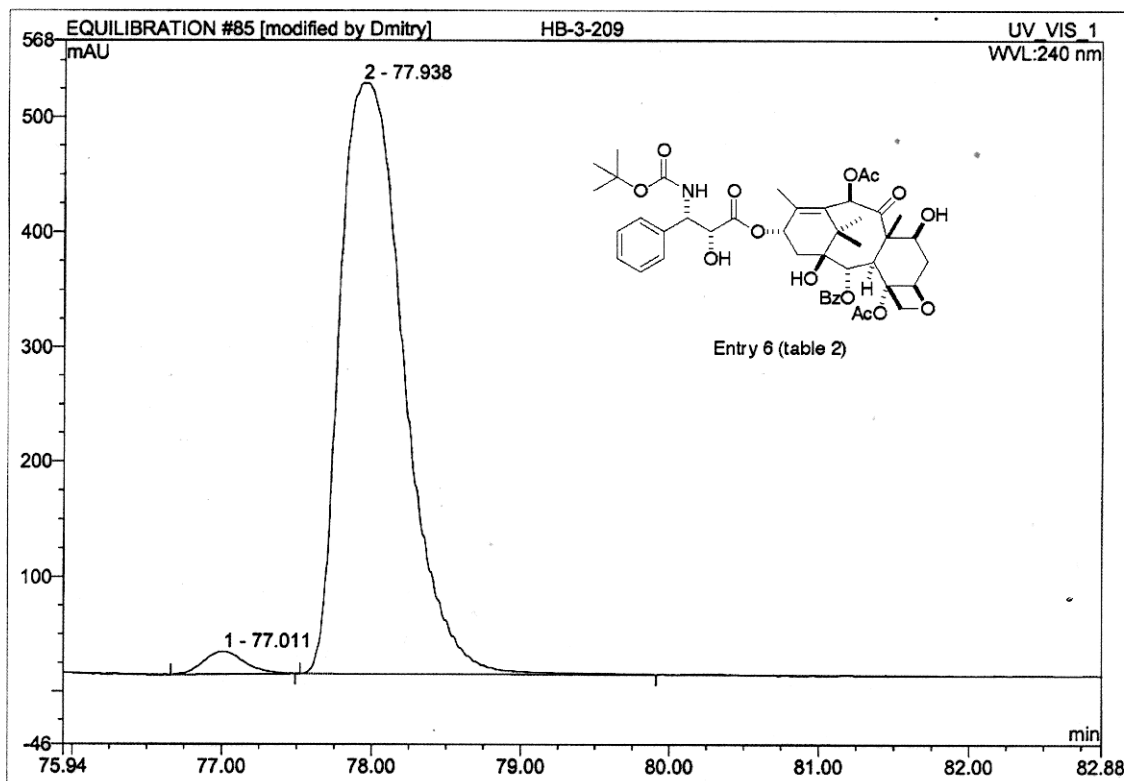

| No.           | Ret.Time min | Peak Name | Height mAU     | Area mAU*min   | Rel.Area %    | Amount n.a.  | Type |
|---------------|--------------|-----------|----------------|----------------|---------------|--------------|------|
| 1             | 77.01        | n.a.      | 19.865         | 6.405          | 2.45          | n.a.         | BMB* |
| 2             | 77.94        | n.a.      | 514.754        | 255.132        | 97.55         | n.a.         | BMB* |
| <b>Total:</b> |              |           | <b>534.619</b> | <b>261.537</b> | <b>100.00</b> | <b>0.000</b> |      |

|                     |                   |                   |          |
|---------------------|-------------------|-------------------|----------|
| <b>958 HB-3-195</b> |                   |                   |          |
| Sample Name:        | HB-3-195          | Injection Volume: | 50.0     |
| Vial Number:        | 25                | Channel:          | UV_VIS_1 |
| Sample Type:        | unknown           | Wavelength:       | 240      |
| Control Program:    | C4-0-70-2ml-70min | Bandwidth:        | 1        |
| Quantif. Method:    | BRSL              | Dilution Factor:  | 1.0000   |
| Recording Time:     | 8/19/05 15:49     | Sample Weight:    | 1.0000   |
| Run Time (min):     | 75.00             | Sample Amount:    | 1.0000   |

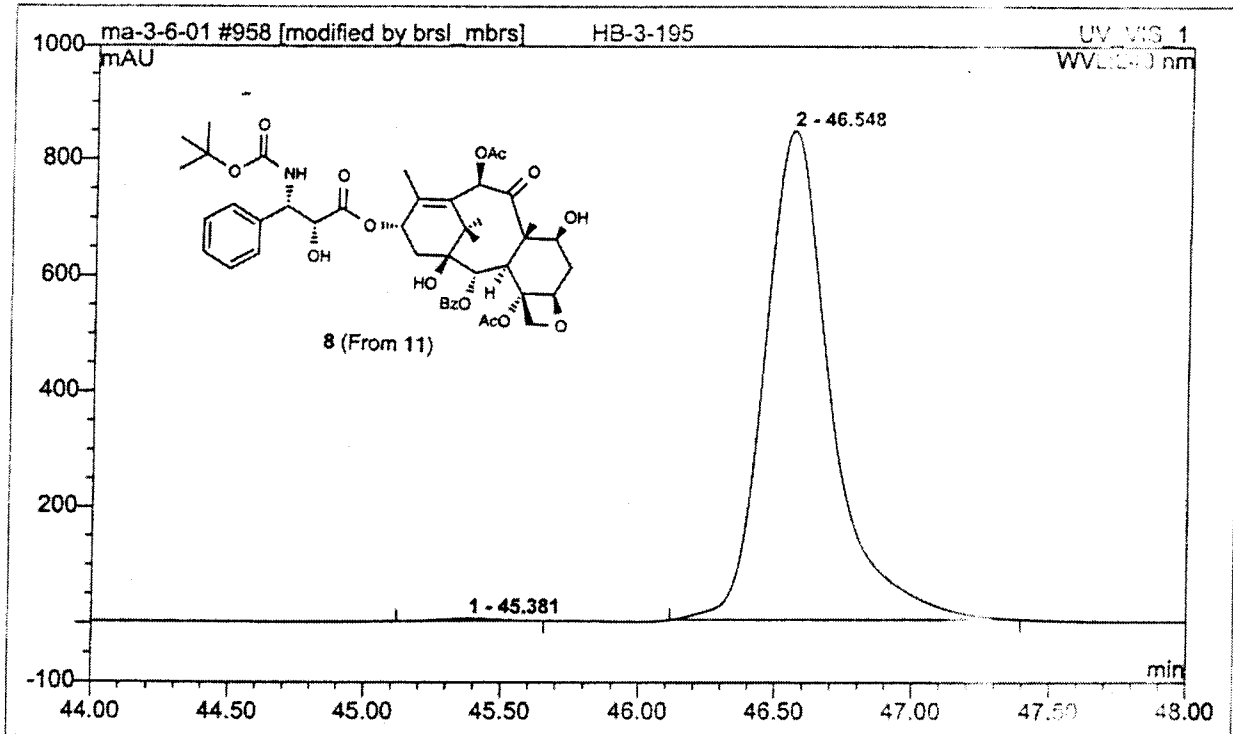

| No.           | Ret.Time<br>min | Peak Name | Height<br>mAU | Area<br>mAU*min | Rel.Area<br>% | Amount | Type |
|---------------|-----------------|-----------|---------------|-----------------|---------------|--------|------|
| 1             | 45.38           | n.a.      | 4.383         | 1.102           | 0.46          | n.a.   | BMB  |
| 2             | 46.55           | n.a.      | 843.737       | 236.745         | 99.54         | n.a.   | BMB* |
| <b>Total:</b> |                 |           | 848.121       | 237.846         | 100.00        | 0.000  |      |
